1           **Structure of the unique tetrameric STENOFOLIA homeodomain bound with DNA**

2 Prabhat Kumar Pathak<sup>+1</sup>, Fei Zhang<sup>+2</sup>, Shuxia Peng<sup>+1</sup>, Lifang Niu<sup>2</sup>, Juhi Chaturvedi<sup>1</sup>, Million  
3 Tadege<sup>2</sup>, Junpeng Deng<sup>\*1</sup>

4 *<sup>1</sup>Department of Biochemistry and Molecular biology, Oklahoma State University, Stillwater, OK*  
5 *74078, USA.*

6 *<sup>2</sup>Department of Plant and Soil Sciences, Institute for Agricultural Biosciences, Oklahoma State*  
7 *University, Ardmore, OK 73401, USA.*

8  
9

10 Running title: Structural basis for DNA binding by STF

11 <sup>+</sup>These authors contribute equally

12 **\*Corresponding author.** All correspondence should be addressed to: Dr. Junpeng Deng, Email:  
13 Junpeng.deng@okstate.edu

14

15 **Abstract**

16 Homeobox transcription factors are key regulators of morphogenesis and development in both  
17 animals and plants<sup>1</sup>. In plants, the WUSCHEL-related homeobox (WOX) family transcription  
18 factors function as central organizers of several developmental programs from embryo patterning  
19 to meristematic stem cell maintenance through transcriptional activation and repression<sup>2-4</sup>. The  
20 structure of WOX Homeodomain (HD) and the molecular mechanism of its interaction with  
21 DNA are unknown. Here, we report the 2.1 Å crystal structure of the STENOFOLIA (STF) HD  
22 from *Medicago truncatula* in complex with DNA. STF binds DNA as a novel cooperative  
23 tetramer, enclosing nearly entire bound DNA surface. The STF tetramer is partially stabilized by  
24 docking of the C-terminal tail from one protomer onto a conserved hydrophobic surface on the  
25 head of another in a head-to-tail manner. Helix  $\alpha 3$  not only serves a canonical role as a base  
26 reader in the major groove, but also provides extensive binding to DNA in the minor groove. Our  
27 structural and functional data reveal that STF specifically targets 'TGA' sequence and the  
28 cooperative tetrameric binding with DNA is key to transcriptional repression in plants. Our data  
29 reveal an unprecedented HD:DNA recognition mechanism, representing the first plant HD  
30 structure from WOX family of transcription factors.  
31

## 32 Introduction

33 HD containing transcription factors are one of the most powerful regulators of morphology and  
34 differentiation in fungi, animals and plants<sup>5,6</sup>. The *WUCHEL-RELATED HOMEBOX* (WOX)  
35 family is unique to plants<sup>7</sup>, and instructs plant growth and development from a small group of  
36 pluripotent cells analogous to the stem cell niche animals. WOX genes play central roles in  
37 apical-basal polarity patterning during embryogenesis and maintaining the stem cell niches at  
38 various plant meristems during post-embryonic shoot and root growth and lateral organ  
39 development such as leaves and flowers<sup>8-14</sup>. WUSCHEL(WUS), the founding member of the  
40 WOX family, is a conserved key regulator for shoot apical meristem (SAM) and axillary  
41 meristem<sup>3,13,15-17</sup>. WUS paralogs including WOX5 in root apical meristem<sup>4</sup>, WOX4 in  
42 procambial/cambial meristem<sup>18,19</sup>, and WOX1 and WOX3 in leaf marginal meristem<sup>20,21</sup>  
43 perform similar functions. The *Medicago truncatula* WOX1 gene, *STENOFOLIA* (STF), and its  
44 *Nicotiana sylvestris* ortholog, *LAMINA1* (*LAMI*) regulate leaf blade outgrowth by promoting cell  
45 proliferation at the adaxial-abaxial junction through transcriptional repression<sup>22-24</sup>. WUS clade  
46 WOX members have a promiscuous ability to substitute for the function of each other if driven  
47 by specific promoters as demonstrated by complementing the *lam1* mutant in leaf development<sup>25</sup>  
48 and the *wus* mutant in SAM maintenance<sup>26</sup>, suggesting a conserved mechanism in DNA  
49 recognition and transcriptional repression. WUS clade members including WUS and WOX1-  
50 WOX7 share a conserved WUS box at the C-terminus, specific to the WUS clade<sup>25,27,28</sup>, and a  
51 conserved HD, typical of the whole WOX family<sup>8</sup>. While the HD contacts DNA, the WUS box is  
52 essential for recruitment of the TOPLESS (TPL) family transcriptional co-repressors<sup>24,29</sup>. HD has  
53 a canonical structure comprised of three- $\alpha$ -helical bundle and is found in a large class of  
54 transcription factors ubiquitous in fungi, animals and plants<sup>6</sup>, sharing low sequence identity and  
55 variable recognition sequences<sup>30</sup>. A typical HD is about 60 amino acids long, but several types of  
56 atypical HD proteins have more or fewer<sup>22,31</sup>, including HD of the WOX family containing 65-70  
57 residues. WUS functions by binding to at least two distinct DNA motifs: The G-box motif,  
58 TCACGTGA sequence and the TAAT motif, TTAAT(G/C)(G/C) sequence<sup>9,29,32</sup>. STF can also  
59 strongly bind to WUS binding sites and the (GA)/(CT)<sub>n</sub> elements<sup>33</sup>, indicating conserved motif  
60 recognition by WOX HD. Although HDs from other kingdoms of life have been studied  
61 structurally<sup>6,34-41</sup>, the structure of WOX HD and its DNA binding mechanism remained elusive.  
62 Here, we report the crystal structure of STF HD in complex with dsDNA, representing the first  
63 plant HD with a novel tetrameric structure specific to plants.

64

65

66

## Results

### 67 The structure of STF<sup>85-190</sup>:DNA reveals a novel tetrameric HD

68 Apo STF<sup>85-190</sup> protein appeared as a monomer in solution (Extended Data Fig. 1). However, it  
69 forms a stable complex with DNA in a 1:4 (DNA:protein) stoichiometry (Extended Data Figs. 1,  
70 2). After screening a number of synthetic DNA oligos, we found STF<sup>85-190</sup> readily crystallized  
71 when in complex with a 22-bp DNA promoter sequence. The structure of the complex was  
72 determined by single wavelength anomalous dispersion (SAD) using a selenomethione  
73 substituted triple mutant (L107M/L110M/L130M) STF protein:DNA complex crystal (see  
74 Methods). There are two protein and one DNA molecules in one asymmetric unit of the crystal.  
75 The two STF<sup>85-190</sup> protomers adopt near identical conformation with a root square mean deviation  
76 (rmsd) of 1.5Å over 68 equivalent C $\alpha$  atoms. Together with two additional crystallographically  
77 related protein molecules, STF<sup>85-190</sup> binds DNA as a tetramer (Fig. 1), consistent with the

78 stoichiometry in solution. The structure of STF<sup>85-190</sup> adopts a canonical HD architecture  
79 comprised of a three  $\alpha$ -helical bundle core connected by well-ordered loops and a long arm of  
80 peptide at the N-terminus, and an additional short helix  $\alpha$ 4 at the C-terminal tail, with an overall  
81 dimension of approximately 42Å x 32Å x 25Å. Helix  $\alpha$ 3 is significantly longer than other helices  
82 and perpendicular to  $\alpha$ 2, adopting a classical helix turn helix motif.

83 The STF<sup>85-190</sup> tetramer (HDA, HDB, HDC, HDD) tightly clamps around nearly the entire  
84 surface of the DNA spanning three grooves (Fig. 1b, d), burying about 5,435Å<sup>2</sup> solvent  
85 accessible surface (SAS). The tetramer is organized as dimer of dimers (Fig.1) with HDA:HDB  
86 dimer packs against HDC:HDD dimer in the DNA major groove. The STF-HD dimers are  
87 associated in a head to tail manner involving the short helix  $\alpha$ 4 at the C-terminus of one protomer  
88 docked onto a common hydrophobic surface on the head of the following protomer. This  
89 docking pocket is constituted from nonpolar residues located on helix  $\alpha$ 2 (A120, I123) and  $\alpha$ 3  
90 (G138, aliphatic side chain of K139, F142 and Y143, Fig. 2c, e). In addition, the tail tip of helix  
91  $\alpha$ 3 in HDA is associated with helix  $\alpha$ 1 of HDB in the head via van der Waals interactions,  
92 forming a nearly anti-parallel homodimer (Fig. 1c, same in HDC:HDD dimer). The STF-HD  
93 tetramer is bridged by helix  $\alpha$ 4 of HDB, which is sandwiched between HDA and HDC, with one  
94 surface involved in contacting HDA (A165, S169 and A170, Fig. 2c), burying about 574 Å<sup>2</sup> SAS,  
95 while the opposite surface involved in docking with HDC (F167 and I171, Fig. 2f) burying about  
96 442 Å<sup>2</sup> SAS. HDC:HDD interface is same as HDA:HDB (Extended Data Fig. 3).

97

#### 98 **STF<sup>85-190</sup> recognizes 'TGA' DNA sequence**

99 STF<sup>85-190</sup> tetramer interacts with DNA extensively. HDA and HDC are making contacts with  
100 DNA via both minor and major grooves (Fig. 1). Their N-terminal arms are embracing DNA  
101 from minor groove, while  $\alpha$ 3 helices are inserted into the major groove of the DNA. In both  
102 HDB and HDD, the  $\alpha$ 3 helices, the tip of  $\alpha$ 1 helices, and the  $\alpha$ 1/ $\alpha$ 2 loops are contacting DNA via  
103 minor groove.

104 R96 on the N-terminal arm of HDA is inserted into the minor groove of DNA and forms  
105 bifurcated hydrogen bonds with O2 and O4' atoms of base T10 (Fig. 2a). S95 and W97 are  
106 bracing the DNA via van der Waals interactions (Fig. 2a). These exquisite interactions contribute  
107 to DNA binding affinity, and R96A mutation abolished DNA binding (Fig. 3a). The helix  $\alpha$ 3 of  
108 HDA is sandwiched in the major groove, making extensive interactions with both backbone and  
109 bases. Specifically, the N147 side chain is recognizing base A12 through hydrogen bonds with  
110 N7 and O6 atoms on the base and the guanidinium head of R151 is hydrogen bonded with N7  
111 and O6 atoms of base G11 (Fig. 2b). Therefore, N147 and R151 together could serve as a  
112 molecular probe for recognizing the 'TGA' DNA fingerprint. In addition to these base specific  
113 interactions, helix  $\alpha$ 3 are contacting the backbone of DNA via hydrogen bonds and salt bridges  
114 (N140, K149 and R153), as well as hydrophobic interactions with the DNA bases (F142, Y143)  
115 and backbone (K139, W144).

116 With its helix  $\alpha$ 4 tethered on the head of HDA (Fig. 2d), HDB is contacting DNA mainly  
117 in the minor groove via basic and polar residues from helix  $\alpha$ 3 (Q159, R153 and R156),  $\alpha$ 1/ $\alpha$ 2  
118 loop (R116) and helix  $\alpha$ 1 (Y111). Except R156 that is hydrogen bonded with N3 atom on base  
119 A5' (reverse strand) in the minor groove, all others are making DNA backbone contacts via  
120 hydrogen bonding and salt bridges (Fig. 2d). The insertion of helix  $\alpha$ 4 of HDB into the major  
121 groove causes a slight widening of the groove and a minor kink on the DNA backbone.

122 The N-terminal arm of HDC interacts with the minor groove of DNA in a similar way as  
123 observed in HDA. R96 forming hydrogen bonds with base A20, while flanking S95 and W97

124 embrace the DNA via van der Waals interactions (Fig. 2e). With its head tethered with the tail of  
125 HDB (Fig. 2f), helix  $\alpha 3$  of HDC is sandwiched in the major groove of the DNA, forming  
126 extensive interactions with DNA similar to HDA (Fig. 2g). N147 and R151 are again serving as  
127 a base reader, recognizing A5'/G4' step. NE2 of Q146 is hydrogen bonded with O4 atom on base  
128 T7'. This interaction may not be base specific since OE1 of Q146 could be hydrogen bonded  
129 with N4 of a cytosine base. K139, F142 and Y143 are embracing the backbone and bases  
130 through van der Waals interactions. The charged and polar heads of K149, Y143 and R153 on  
131 helix  $\alpha 3$  are also binding DNA backbone through hydrogen bonding and salt bridges (Figs. 2f,  
132 2g).

133 While the head of HDD is tethered with the tail of HDC (Extended Data Fig. 3), the tip of  
134 the helix  $\alpha 3$  of HDD is inserted into the following minor groove at the junction between two  
135 pseudo-continuous DNA molecules (Fig. 2h). HDD mainly interacts with the backbone of the  
136 DNA via a cluster of basic residues (R116 on  $\alpha 1/\alpha 2$  loop, R153 on helix  $\alpha 3$ , and R157 and R158  
137 on  $\alpha 3/\alpha 4$  loop), with the addition of hydrogen bond contributed from Y111 on helix  $\alpha 1$  (Fig.  
138 2h). In addition, R156 on helix  $\alpha 3$  is forming bifurcated hydrogen bond with N3 of base A4 and  
139 O4' of base A5 on the subsequent DNA molecule. These interactions may contribute to DNA  
140 binding affinity.

141

#### 142 **Structure based mutagenesis: key residues for DNA recognition and tetramer** 143 **organization**

144 Based on the current complex structure, we carried out mutagenesis to identify key residues of  
145 STF<sup>85-190</sup> that are essential for DNA binding and STF function. We found R96A mutation nearly  
146 abolished DNA binding and *lam1* mutant complementation (Fig. 3a-d). Mutation of R113Q, on  
147 the other hand, did not affect the DNA binding, which is consistent to the observation that R113  
148 not significantly involved in DNA binding (Fig. 3a, e). Triple alanine substitutions of the positive  
149 charge cluster on helix  $\alpha 3$ , KRR/AAA (155-157) reduced the binding, and the combination of  
150 KRR/AAA and R113Q mutations greatly reduced the DNA binding and STF's ability to rescue  
151 the *lam1* mutant (Fig. 3a, f, g).

152 The STF protein can bind DNA sequences with either "TGA" or "TAAT" specificity  
153 (Extended Data Figs. 4, 5). In the STF<sup>85-190</sup>-DNA crystal structure, R151 is specific to bind the  
154 guanine of the second base pair of the "TGA" sequence, although the "TAAT" box is also present  
155 in the 22bp DNA (Fig. 1e). To identify the determinant motif, we tested STF binding with either  
156 "TGA" or "TAAT" sequences. The R151A mutation abolished binding to the "TGA" containing  
157 DNA, while retained binding to "TAAT" at a reduced level (Fig. 3h, i). The R151A mutant  
158 significantly lost the ability to complement the *lam1* mutant (Fig. 3j), and disrupted tetrameric  
159 binding to DNA in EMSA (Extended Data Fig. 6), indicating that R151-mediated STF HD  
160 binding to the TGA motif is crucial for STF function. To evaluate the significance of STF  
161 tetramer in DNA binding and STF function *in planta*, we carried out mutagenesis at the tetramer  
162 interface based on the structure. Specifically, we substituted the two highly conserved aromatic  
163 residues at the docking pocket, F142 and Y143, which not only provide a platform for accepting  
164 the helix  $\alpha 4$  of the neighboring protomer, but also embrace DNA bases via van der Waals  
165 interactions to provide affinity. We found that the F142Y/Y143N double mutation abolished the  
166 cooperative tetrameric binding to DNA in EMSA-based agarose gel shift assay (Extended Data  
167 Fig. 7), and reduced the STF repressive activity (Extended Data Fig. 8a, b), leading to reduced  
168 *lam1* complementation (Extended Data Fig 8c, d). Similarly, N147I mutation abolished its

169 binding to DNA and *lam1* complementation (<sup>24</sup> and Extended Data Fig 8d), suggesting essential  
170 roles of R96, F142, Y143, N147 and R151 residues for the STF tetrameric structure and function.

171

172

## Discussion

173 WOX family proteins are plant specific transcription factors that play central roles as master  
174 regulators of zygotic and embryonic patterning, stem-cell maintenance and lateral organ  
175 development<sup>3,4,20-22,42</sup>. However, the structure and mechanism of plant HD recognition of DNA  
176 remains elusive. Here we report the first WOX-HD crystal structure, in which the STF helix  $\alpha 3$   
177 not only recognizes DNA from major groove as the single base “recognition” helix seen in all  
178 known HDs<sup>30</sup>, but also provides extensive interactions with DNA from minor groove (Fig. 2).  
179 STF<sup>85-190</sup> probes the DNA bases in the minor groove with R96 on its N-terminal arm, and in the  
180 major groove with two residues, N147 and R151 on helix  $\alpha 3$  similar to other HDs. Although the  
181 STF-HD could recognize both the ‘TAAT’ and TGA(X)<sub>2-5</sub>TCA motifs (Fig. 1e), STF<sup>85-190</sup> strongly  
182 binds only to the ‘TGA’ motif in the current structure. This is consistent with reports indicating  
183 that the binding affinity of the TGA(X)<sub>2-5</sub>TCA is 20-fold higher than the ‘TAAT’ motif<sup>29</sup>, and  
184 STF preferentially targets GA/TC sequences<sup>33</sup>. This difference in binding affinity could therefore  
185 offer WOX-HD to bind to specific targets distinct from other HD proteins.

186 While all other HD:DNA structures solved to date involve either monomer or dimer  
187 HDs<sup>6,43</sup>, STF:DNA complex revealed an unprecedented tetrameric configuration. The tetramer  
188 clamps to the DNA over nearly the entire surface of the bound DNA region, in contrast to just a  
189 portion of bound DNA surface observed in other structures. This unique STF homo-tetramer  
190 resulted from cooperative binding to substrate DNA, and is stabilized by the bridging helix  $\alpha 4$  as  
191 a C-terminal extension to the canonical HD core. The STF-HD tetramer is organized as a dimer  
192 of dimers with each dimer displaying a unique head to tail antiparallel unit (Fig. 1c). Although  
193 head to tail type of association was observed in yeast MATa1 and MAT $\alpha$ 2 HD heterodimer  
194 bound with DNA<sup>39</sup>, in contrast to the helix  $\alpha 4$  of MAT $\alpha$ 2 bound on the surface of helix  $\alpha 1$  and  
195  $\alpha 2$  in MATa1, the helix  $\alpha 4$  of one STF HD is docked on helix  $\alpha 2$  and  $\alpha 3$  at the head of the other,  
196 forming a unique tetramer. In addition, the nearly antiparallel dimer association of STF HD in a  
197 head to tail manner is unprecedented.

198 The WOX family has been phylogenetically divided into WUS/ modern clade,  
199 WOX9/intermediate clade, and WOX13/ancient clade with transcriptional repression activity in  
200 the WUS and activation activity in the WOX9 and WOX13 clades<sup>25,26,44,45</sup>. While the STF-HD  
201 tetramer is typical of the WUS clade, it is yet to be shown if DNA binding as cooperative  
202 tetramer is a feature of the entire WOX family. The STF G138 and K139 residues replacement  
203 with D138 and A139 in WOX9 could potentially compromise its interactions with DNA  
204 backbone, weakening the tetramer association. In addition, WOX13/ancient clade HDs have a  
205 F142Y and Y143N substitution (<sup>44</sup> and Extended Data Fig. 9), which could drastically weaken  
206 both its DNA binding and tetramer association (Extended Data Fig. 7). Thus, it will be  
207 interesting to see if the WOX-HD offers explanation to the evolutionary dynamic nature of WOX  
208 family proteins, in addition to the diagnostic WUS box that recruits TPL for transcriptional  
209 repression. TPL forms a tetramer for its co-repressor function and the oligomeric states of  
210 repressors could dramatically alter the TPL binding affinity<sup>46</sup>. This suggests that the STF-HD  
211 tetramer could enhance its association with TPL by multivalent interactions, conferring  
212 preferential advantage to WUS clade WOX proteins. Our data uncovers a novel HD:DNA

213 recognition mechanism and provides mechanistic insight into the function of dynamic WOX  
214 genes and their contribution to the complex morphology and developmental evolution of higher  
215 plants.

216

217

## Figure Legends

218

219 **Figure 1. STF<sup>85-190</sup> binds DNA as a unique tetramer.** **a.** Depicted are STF<sup>85-190</sup> tetramer (HDA in  
220 yellow, HDB in blue, HDC in green and HDD in light brown) in complex with a 22-bp DNA  
221 (color in magenta). The secondary structures are labeled. **b** and **c** are views from 90° rotations.  
222 The secondary DNA forming the pseudo-continuous helix is shown in orange. **d.** The  
223 eletropotential surface of STF<sup>85-190</sup> tetramer is shown. Note, nearly the entire DNA surface is  
224 clamped by the protein. **e.** The dsDNA bound sequence from target promoter is shown.

225

226 **Figure 2. The structure of STF<sup>85-190</sup>:DNA complex.** **a.** HDA N-terminal arm showing  
227 interaction with DNA minor groove. **b.** HDA helix  $\alpha 3$  inserts into DNA major groove and  
228 interacts with bases and backbone. **c.** The HDA:HDB dimer interface. The hydrophobic residues  
229 lining the docking pocket are shown as sticks, with dotted envelopes indicating the van der  
230 Waals radius. **d.** Helix  $\alpha 3$  of HDB contacts DNA in the minor groove. **e.** HDC N-terminal arm  
231 interacts with DNA minor groove. **f.** HDB:HDC dimer interface. **g.** Helix  $\alpha 3$  of HDC contacts  
232 DNA in the major groove. **h.** HDD helix  $\alpha 3$  contacts DNA in the minor groove. The hydrogen  
233 bonds and salt bridges are indicated as red dashed lines. Color scheme is same as in Fig. 1.

234

235 **Figure 3. Key residues of STF-HD for DNA binding and *in vivo* function.** **a.** EMSA showing  
236 that mutations in STF-HD affect the DNA binding ability *in vitro*. **b-g.** Phenotypes of *lam1*  
237 mutant (**b**) plants complemented with wild type *STF:STF* (**c**), or mutants *STF:STF-R96A* (**d**)  
238 *STF:STF-R113Q* (**e**), *STF:STF-K155AR156AR157A* (**f**), *STF:STF-R113QK155AR156AR157A*  
239 (**g**). **h.** EMSA showing that R151A mutation nearly abolished STF's binding to the "TGA"  
240 sequence (GCAAATCTATGATCTATTCAAG). **i.** EMSA showing that R151A mutation only  
241 reduced STF's binding to "TAAT" sequence (GCAAATTAATTATTTATTAAAG). **j.**  
242 Phenotype of *lam1* mutant plant complemented with *STF:STF-R151A*.

243

244

## Methods

### Protein purification and crystallization

246 The coding sequence of *Medicago truncatula* STENOFOLIA\_85-190 residues was amplified by  
247 PCR and inserted into a modified PET vector as a MBP fusion with a N-terminal 6XHis-tag that  
248 is cleavable by Tabaco etch virus protease (TEV). The recombinant protein was expressed in  
249 *E.coli* and purified by Ni-NTA as previously described<sup>47</sup>. Briefly, STF<sup>85-190</sup> protein was first  
250 purified from soluble cell lysate using Ni-NTA affinity column. The eluted protein was  
251 subsequently subjected to TEV protease cleavage and was collected as flow through of a second  
252 subtracting Ni-NTA column. The protein was further purified by size exclusion chromatography  
253 and cation exchange purification to homogeneity. Mutant STF proteins were purified same as  
254 WT. The purified proteins were concentrated to 20-25 mg/ml in buffer 20 mM Tris-HCl, pH 7.4,  
255 125 mM NaCl and 5 mM TCEP [Tris (2-carboxyethyl)phosphate ], flash frozen and stored at -  
256 80 °C until usage<sup>48</sup>. STF<sup>85-190</sup> L107M/L110M/L130 M triple mutant was cloned using the PCR-  
257 based site-directed mutagenesis method. The selenomethionine (SeMet) substituted proteins

258 were expressed in *E.coli* BL21(DE3) with SeMet supplemented in M9 medium, and purified  
259 using the same procedures as described above.

260 The 22-bp synthetic oligonucleotides containing the sequence 5'-  
261 GCAAATTAATGATTATTCAAG-3' and its complementary oligonucleotide 5'-  
262 CTTGAATAAATCATTAATTTGC-3' were annealed in buffer containing 50 mM HEPES,  
263 pH7.2, 50 mM NaCl, 5 mM MgCl<sub>2</sub>, with a temperature gradient from 95°C to 23°C in 2 hours.  
264 STF<sup>85-190</sup> was mixed with the 22-bp DNA at 4:1 molar ratio before crystallization trials. The  
265 complex crystals for both WT and SeMet substituted triple mutant crystals were both obtained  
266 from a condition containing 0.15 M sodium chloride 28% v/v PEG Smear Medium at 20 °C. 20%  
267 glycerol was added to the mother liquid as cryoprotectant.

268

### 269 **Structural determinations**

270 All data were collected at the beamline 19-ID at the Advanced Photon Source (APS), Argonne  
271 National Laboratory. Our attempts of using molecular replacement method to solve the native  
272 data set using canonical HD domain structures as templates failed. Selenomethionine (SeMet)  
273 substitution of WT protein could not yield usable anomalous signal to solve the structure due to  
274 disorder of the single M160 present in the protein. Based on the homology modeling with HD  
275 domains, we made a triple mutant of STF by substituting three buried leucine residues with  
276 methionines (L107M/L110M/L130M). The structure of STF<sup>85-190</sup>:DNA complex was solved by  
277 Single-Wavelength-Anomalous-Dispersion method using program HKL3000<sup>49</sup>, with data  
278 collected from a single SeMet substituted triple mutant protein crystal. 70% of all protein  
279 residues were constructed from the experimental phases obtained from the SeMet crystal data  
280 using the program Autobuild in PHENIX<sup>50</sup>. The remaining residues and the 22-bp DNA were  
281 built manually using COOT<sup>51</sup>. This model was used to solve the native structure at higher  
282 resolution by molecular replacement method using program Phaser<sup>52</sup>. PHENIX program<sup>50</sup> was  
283 used for the refinement, and COOT<sup>51</sup> was used for the iterative manual model building.  
284 Translation, libration and screw-rotation displacement (TLS) groups used in the refinement were  
285 defined by the TLMSD server<sup>53</sup>. The final  $R_{work}$  and  $R_{free}$  for the refined model were 19.4% and  
286 25.0%, respectively. The current model is of good geometry and refinement statistics (Extended  
287 Data Table 1). All molecular graphic figures were generated with PYMOL<sup>54</sup>.

288

### 289 **EMSA for protein:DNA binding**

290 Purified STF<sup>85-190</sup> proteins were tested for DNA binding on agarose gel based EMSA. 6-FAM  
291 labeled DNA oligos (*IDTdna*) was mixed with purified proteins at various molar ratios and  
292 incubated on ice for 60 minutes before electrophoresis on 1% agarose gel in TAE buffer for 60  
293 min at 90V at 4°C. The gel was subsequently analyzed on a Biorad ChemiDoc fluorescence  
294 imager with 497 nm Ex and 520 nm Em wavelengths.

295 STF<sup>85-190</sup> proteins binding with DNA were also analyzed by native polyacrylamide gel  
296 based EMSA as previously described<sup>55</sup>. Briefly, oligos were synthesized with the 3' Biotin CPG  
297 modification. Oligos were annealed and incubated with His-MBP, His-MBP-STF or His-MBP-  
298 STF mutant fusion proteins using the Light Shift Chemiluminescent EMSA Kit (*Pierce*) at room  
299 temperature for 30 min. The binding reaction was: 1x binding buffer, 2.5% glycerol, 5 ng/  $\mu$ L  
300 Poly (dI.dC), 0.05% NP-40, 50 mM KCl, 0.05  $\mu$ g/ $\mu$ L purified protein, 5 fmol/ $\mu$ L annealed oligos.  
301 Gel electrophoresis was performed on a 5% native polyacrylamide gel. After blotting on a  
302 positively charged nylon membrane, the DNA was cross-linked using a transilluminator at



303 standard condition. The biotin-labeled DNA was then detected by using the Chemiluminescent  
304 Nucleic Acid Detection Module Kit (*Pierce*).

305

### 306 **Plant Materials and Growth Conditions**

307 The *Nicotiana sylvestris* (*N. sylvestris*) wild type and *lam1* mutant were used in this research.  
308 Plants were grown in a controlled greenhouse with 24°C/16-h (day) and 20°C/8-h (night)  
309 photoperiods, 60%-70% relative humidity, and 150  $\mu\text{mol m}^{-2} \text{s}^{-1}$  light intensity.

310

### 311 **Plasmid Construction and Plant Transformation**

312 All *lam1* complementation assays were performed by using the pSTF-pMDC32 Gateway vector  
313 as described<sup>25</sup>. The mutations in STF were introduced using appropriate mutagenic primers and  
314 were confirmed by sequencing. STF and the mutated forms were cloned to pDONR207 vector  
315 and then ligated to the pSTF-pMDC32 destination vector by LR reaction (*Invitrogen*). Constructs  
316 were introduced into *Agrobacterium tumefaciens* strain GV2260 for *N. sylvestris* transformation.  
317 Leaf blades from 2-month old *lam1* mutant were used for the transformation. The transformation  
318 was performed as previously described<sup>22</sup>. The complementation strength was evaluated by the  
319 leaf length/width ratio of the largest leaf in each independent transgenic lines (Extended Data  
320 Fig. 8). At least 10 independent lines were analyzed for each construct.

321

322

### 323 **Acknowledgements**

324 We gratefully acknowledge the staff of beam-line 19ID at the Advanced Photon Source for their  
325 support. This project was supported by the Oklahoma Agricultural Experiment Station at  
326 Oklahoma State University under project OKL03060 to J.D and by the National Science  
327 Foundation under grant IOS-1354422 to M.T. The authors declare no competing interest.

328

329 **Author Contributions:** J.D. and M.T. designed research; P.P. and S.P. determined the STF<sup>785-</sup>  
330 <sup>190</sup>-DNA structure. F.Z. and L.N. carried out mutagenesis, DNA binding assays and transgenic  
331 plant studies; P.P. and J.C. carried out protein purification and DNA binding studies; S.P., F.Z.,  
332 M.T. and J.D. analyzed data and wrote the paper.

333 **Author Information:** Atomic coordinates and structure factors have been deposited with the  
334 Protein Data Bank, [www.rcsb.org](http://www.rcsb.org), with accession codes 6WIG. Reprints and permissions  
335 information is available at [www.nature.com/reprints](http://www.nature.com/reprints). The authors declare no competing financial  
336 interests. Correspondence should be addressed to J.D. ([Junpeng.deng@okstate.edu](mailto:Junpeng.deng@okstate.edu)).

337

### 338 **References**

339

- 340 1 Garcia-Fernandez, J. The genesis and evolution of homeobox gene clusters. *Nature reviews.*  
341 *Genetics* **6**, 881-892, doi:10.1038/nrg1723 (2005).
- 342 2 Zhou, Y. *et al.* Control of plant stem cell function by conserved interacting transcriptional  
343 regulators. *Nature* **517**, 377-380, doi:10.1038/nature13853 (2015).
- 344 3 Mayer, K. F. *et al.* Role of WUSCHEL in regulating stem cell fate in the Arabidopsis shoot  
345 meristem. *Cell* **95**, 805-815, doi:10.1016/s0092-8674(00)81703-1 (1998).
- 346 4 Sarkar, A. K. *et al.* Conserved factors regulate signalling in Arabidopsis thaliana shoot and root  
347 stem cell organizers. *Nature* **446**, 811-814, doi:10.1038/nature05703 (2007).

- 348 5 Miksiunas, R., Mobasher, A. & Bironaite, D. Homeobox Genes and Homeodomain Proteins: New  
349 Insights into Cardiac Development, Degeneration and Regeneration. *Advances in experimental*  
350 *medicine and biology* **1212**, 155-178, doi:10.1007/5584\_2019\_349 (2020).
- 351 6 Burglin, T. R. & Affolter, M. Homeodomain proteins: an update. *Chromosoma* **125**, 497-521,  
352 doi:10.1007/s00412-015-0543-8 (2016).
- 353 7 Mukherjee, K., Brocchieri, L. & Burglin, T. R. A comprehensive classification and evolutionary  
354 analysis of plant homeobox genes. *Molecular biology and evolution* **26**, 2775-2794,  
355 doi:10.1093/molbev/msp201 (2009).
- 356 8 Costanzo, E., Trehin, C. & Vandenbussche, M. The role of WOX genes in flower development.  
357 *Annals of botany* **114**, 1545-1553, doi:10.1093/aob/mcu123 (2014).
- 358 9 Yadav, R. K. *et al.* WUSCHEL protein movement mediates stem cell homeostasis in the  
359 Arabidopsis shoot apex. *Genes & development* **25**, 2025-2030, doi:10.1101/gad.17258511 (2011).
- 360 10 Han, H., Liu, X. & Zhou, Y. Transcriptional circuits in control of shoot stem cell homeostasis.  
361 *Current opinion in plant biology* **53**, 50-56, doi:10.1016/j.pbi.2019.10.004 (2020).
- 362 11 Hao, Q., Zhang, L., Yang, Y., Shan, Z. & Zhou, X. A. Genome-Wide Analysis of the WOX Gene  
363 Family and Function Exploration of GmWOX18 in Soybean. *Plants (Basel, Switzerland)* **8**,  
364 doi:10.3390/plants8070215 (2019).
- 365 12 Jha, P., Ochatt, S. J. & Kumar, V. WUSCHEL: a master regulator in plant growth signaling. *Plant*  
366 *cell reports* **39**, 431-444, doi:10.1007/s00299-020-02511-5 (2020).
- 367 13 Kieffer, M. *et al.* Analysis of the transcription factor WUSCHEL and its functional homologue in  
368 Antirrhinum reveals a potential mechanism for their roles in meristem maintenance. *The Plant*  
369 *cell* **18**, 560-573, doi:10.1105/tpc.105.039107 (2006).
- 370 14 Laux, T., Mayer, K. F., Berger, J. & Jurgens, G. The WUSCHEL gene is required for shoot and floral  
371 meristem integrity in Arabidopsis. *Development (Cambridge, England)* **122**, 87-96 (1996).
- 372 15 Meng, Y. *et al.* HEADLESS, a WUSCHEL homolog, uncovers novel aspects of shoot meristem  
373 regulation and leaf blade development in *Medicago truncatula*. *Journal of experimental botany*  
374 **70**, 149-163, doi:10.1093/jxb/ery346 (2019).
- 375 16 Stuurman, J., Jaggi, F. & Kuhlemeier, C. Shoot meristem maintenance is controlled by a GRAS-  
376 gene mediated signal from differentiating cells. *Genes & development* **16**, 2213-2218,  
377 doi:10.1101/gad.230702 (2002).
- 378 17 Wang, H. *et al.* HEADLESS Regulates Auxin Response and Compound Leaf Morphogenesis in  
379 *Medicago truncatula*. *Frontiers in plant science* **10**, 1024, doi:10.3389/fpls.2019.01024 (2019).
- 380 18 Hirakawa, Y., Kondo, Y. & Fukuda, H. TDIF peptide signaling regulates vascular stem cell  
381 proliferation via the WOX4 homeobox gene in Arabidopsis. *The Plant cell* **22**, 2618-2629,  
382 doi:10.1105/tpc.110.076083 (2010).
- 383 19 Ji, J. *et al.* WOX4 promotes procambial development. *Plant physiology* **152**, 1346-1356,  
384 doi:10.1104/pp.109.149641 (2010).
- 385 20 Nakata, M. *et al.* Roles of the middle domain-specific WUSCHEL-RELATED HOMEODOMAIN genes in  
386 early development of leaves in Arabidopsis. *The Plant cell* **24**, 519-535,  
387 doi:10.1105/tpc.111.092858 (2012).
- 388 21 Vandenbussche, M. *et al.* Differential recruitment of WOX transcription factors for lateral  
389 development and organ fusion in *Petunia* and Arabidopsis. *The Plant cell* **21**, 2269-2283,  
390 doi:10.1105/tpc.109.065862 (2009).
- 391 22 Tadege, M., Lin, H., Niu, L. & Mysore, K. S. Control of dicot leaf blade expansion by a WOX gene,  
392 STF. *Plant signaling & behavior* **6**, 1861-1864, doi:10.4161/psb.6.11.17761 (2011).
- 393 23 Lin, H., Niu, L. & Tadege, M. STENOFOLIA acts as a repressor in regulating leaf blade outgrowth.  
394 *Plant signaling & behavior* **8**, e24464, doi:10.4161/psb.24464 (2013).

- 395 24 Zhang, F. *et al.* STENOFOLIA recruits TOPLESS to repress ASYMMETRIC LEAVES2 at the leaf  
396 margin and promote leaf blade outgrowth in *Medicago truncatula*. *The Plant cell* **26**, 650-664,  
397 doi:10.1105/tpc.113.121947 (2014).
- 398 25 Lin, H. *et al.* Evolutionarily conserved repressive activity of WOX proteins mediates leaf blade  
399 outgrowth and floral organ development in plants. *Proceedings of the National Academy of*  
400 *Sciences of the United States of America* **110**, 366-371, doi:10.1073/pnas.1215376110 (2013).
- 401 26 Dolzblasz, A. *et al.* Stem Cell Regulation by Arabidopsis WOX Genes. *Molecular plant* **9**, 1028-  
402 1039, doi:10.1016/j.molp.2016.04.007 (2016).
- 403 27 Haecker, A. *et al.* Expression dynamics of WOX genes mark cell fate decisions during early  
404 embryonic patterning in *Arabidopsis thaliana*. *Development (Cambridge, England)* **131**, 657-668,  
405 doi:10.1242/dev.00963 (2004).
- 406 28 Ikeda, M., Mitsuda, N. & Ohme-Takagi, M. Arabidopsis WUSCHEL is a bifunctional transcription  
407 factor that acts as a repressor in stem cell regulation and as an activator in floral patterning. *The*  
408 *Plant cell* **21**, 3493-3505, doi:10.1105/tpc.109.069997 (2009).
- 409 29 Busch, W. *et al.* Transcriptional control of a plant stem cell niche. *Developmental cell* **18**, 849-  
410 861, doi:10.1016/j.devcel.2010.03.012 (2010).
- 411 30 Noyes, M. B. *et al.* Analysis of homeodomain specificities allows the family-wide prediction of  
412 preferred recognition sites. *Cell* **133**, 1277-1289, doi:10.1016/j.cell.2008.05.023 (2008).
- 413 31 Burglin, T. R. Analysis of TALE superclass homeobox genes (MEIS, PBC, KNOX, Iroquois, TGIF)  
414 reveals a novel domain conserved between plants and animals. *Nucleic acids research* **25**, 4173-  
415 4180, doi:10.1093/nar/25.21.4173 (1997).
- 416 32 Lohmann, J. U. *et al.* A molecular link between stem cell regulation and floral patterning in  
417 *Arabidopsis*. *Cell* **105**, 793-803, doi:10.1016/s0092-8674(01)00384-1 (2001).
- 418 33 Liu, M. *et al.* The STENOFOLIA gene from *Medicago* alters leaf width, flowering time and  
419 chlorophyll content in transgenic wheat. *Plant biotechnology journal* **16**, 186-196,  
420 doi:10.1111/pbi.12759 (2018).
- 421 34 Fraenkel, E. & Pabo, C. O. Comparison of X-ray and NMR structures for the Antennapedia  
422 homeodomain-DNA complex. *Nature structural biology* **5**, 692-697, doi:10.1038/1382 (1998).
- 423 35 Lu, P., Rha, G. B. & Chi, Y. I. Structural basis of disease-causing mutations in hepatocyte nuclear  
424 factor 1beta. *Biochemistry* **46**, 12071-12080, doi:10.1021/bi7010527 (2007).
- 425 36 Miyazono, K. *et al.* Cooperative DNA-binding and sequence-recognition mechanism of aristaless  
426 and clawless. *The EMBO journal* **29**, 1613-1623, doi:10.1038/emboj.2010.53 (2010).
- 427 37 Passner, J. M., Ryoo, H. D., Shen, L., Mann, R. S. & Aggarwal, A. K. Structure of a DNA-bound  
428 Ultrabithorax-Extradenticle homeodomain complex. *Nature* **397**, 714-719, doi:10.1038/17833  
429 (1999).
- 430 38 Wolberger, C., Vershon, A. K., Liu, B., Johnson, A. D. & Pabo, C. O. Crystal structure of a MAT  
431 alpha 2 homeodomain-operator complex suggests a general model for homeodomain-DNA  
432 interactions. *Cell* **67**, 517-528, doi:10.1016/0092-8674(91)90526-5 (1991).
- 433 39 Li, T., Stark, M. R., Johnson, A. D. & Wolberger, C. Crystal structure of the MATa1/MAT alpha 2  
434 homeodomain heterodimer bound to DNA. *Science (New York, N.Y.)* **270**, 262-269,  
435 doi:10.1126/science.270.5234.262 (1995).
- 436 40 Lee, J. K. *et al.* Crystal Structure of the Double Homeodomain of DUX4 in Complex with DNA. *Cell*  
437 *reports* **25**, 2955-2962.e2953, doi:10.1016/j.celrep.2018.11.060 (2018).
- 438 41 Zhang, Y., Larsen, C. A., Stadler, H. S. & Ames, J. B. Structural basis for sequence specific DNA  
439 binding and protein dimerization of HOXA13. *PloS one* **6**, e23069,  
440 doi:10.1371/journal.pone.0023069 (2011).

- 441 42 Ueda, M., Zhang, Z. & Laux, T. Transcriptional activation of Arabidopsis axis patterning genes  
442 WOX8/9 links zygote polarity to embryo development. *Developmental cell* **20**, 264-270,  
443 doi:10.1016/j.devcel.2011.01.009 (2011).
- 444 43 Wilson, D. S., Guenther, B., Desplan, C. & Kuriyan, J. High resolution crystal structure of a paired  
445 (Pax) class cooperative homeodomain dimer on DNA. *Cell* **82**, 709-719, doi:10.1016/0092-  
446 8674(95)90468-9 (1995).
- 447 44 Wu, C. C., Li, F. W. & Kramer, E. M. Large-scale phylogenomic analysis suggests three ancient  
448 superclades of the WUSCHEL-RELATED HOMEODOMAIN transcription factor family in plants. *PLoS*  
449 *one* **14**, e0223521, doi:10.1371/journal.pone.0223521 (2019).
- 450 45 van der Graaff, E., Laux, T. & Rensing, S. A. The WUS homeobox-containing (WOX) protein family.  
451 *Genome biology* **10**, 248, doi:10.1186/gb-2009-10-12-248 (2009).
- 452 46 Martin-Arevalillo, R. *et al.* Structure of the Arabidopsis TOPLESS corepressor provides insight  
453 into the evolution of transcriptional repression. *Proceedings of the National Academy of*  
454 *Sciences of the United States of America* **114**, 8107-8112, doi:10.1073/pnas.1703054114 (2017).
- 455 47 Krumm, B., Meng, X., Li, Y., Xiang, Y. & Deng, J. Structural basis for antagonism of human  
456 interleukin 18 by poxvirus interleukin 18-binding protein. *Proceedings of the National Academy*  
457 *of Sciences of the United States of America* **105**, 20711-20715, doi:10.1073/pnas.0809086106  
458 (2008).
- 459 48 Deng, J. *et al.* An improved protocol for rapid freezing of protein samples for long-term storage.  
460 *Acta crystallographica. Section D, Biological crystallography* **60**, 203-204,  
461 doi:10.1107/s0907444903024491 (2004).
- 462 49 Minor, W., Cymborowski, M., Otwinowski, Z. & Chruszcz, M. HKL-3000: the integration of data  
463 reduction and structure solution--from diffraction images to an initial model in minutes. *Acta*  
464 *crystallographica. Section D, Biological crystallography* **62**, 859-866,  
465 doi:10.1107/s0907444906019949 (2006).
- 466 50 Adams, P. D. *et al.* PHENIX: a comprehensive Python-based system for macromolecular structure  
467 solution. *Acta crystallographica. Section D, Biological crystallography* **66**, 213-221,  
468 doi:10.1107/s0907444909052925 (2010).
- 469 51 Emsley, P. & Cowtan, K. Coot: model-building tools for molecular graphics. *Acta*  
470 *crystallographica. Section D, Biological crystallography* **60**, 2126-2132,  
471 doi:10.1107/s0907444904019158 (2004).
- 472 52 McCoy, A. J. Solving structures of protein complexes by molecular replacement with Phaser.  
473 *Acta crystallographica. Section D, Biological crystallography* **63**, 32-41,  
474 doi:10.1107/s0907444906045975 (2007).
- 475 53 Painter, J. & Merritt, E. A. Optimal description of a protein structure in terms of multiple groups  
476 undergoing TLS motion. *Acta crystallographica. Section D, Biological crystallography* **62**, 439-450,  
477 doi:10.1107/s0907444906005270 (2006).
- 478 54 DeLano, W. L. The PyMOL Molecular Graphics System. <http://www.pymol.org>. (2002).
- 479 55 Zhang, F. *et al.* An L1 box binding protein, GbML1, interacts with GbMYB25 to control cotton  
480 fibre development. *Journal of experimental botany* **61**, 3599-3613, doi:10.1093/jxb/erq173  
481 (2010).

482

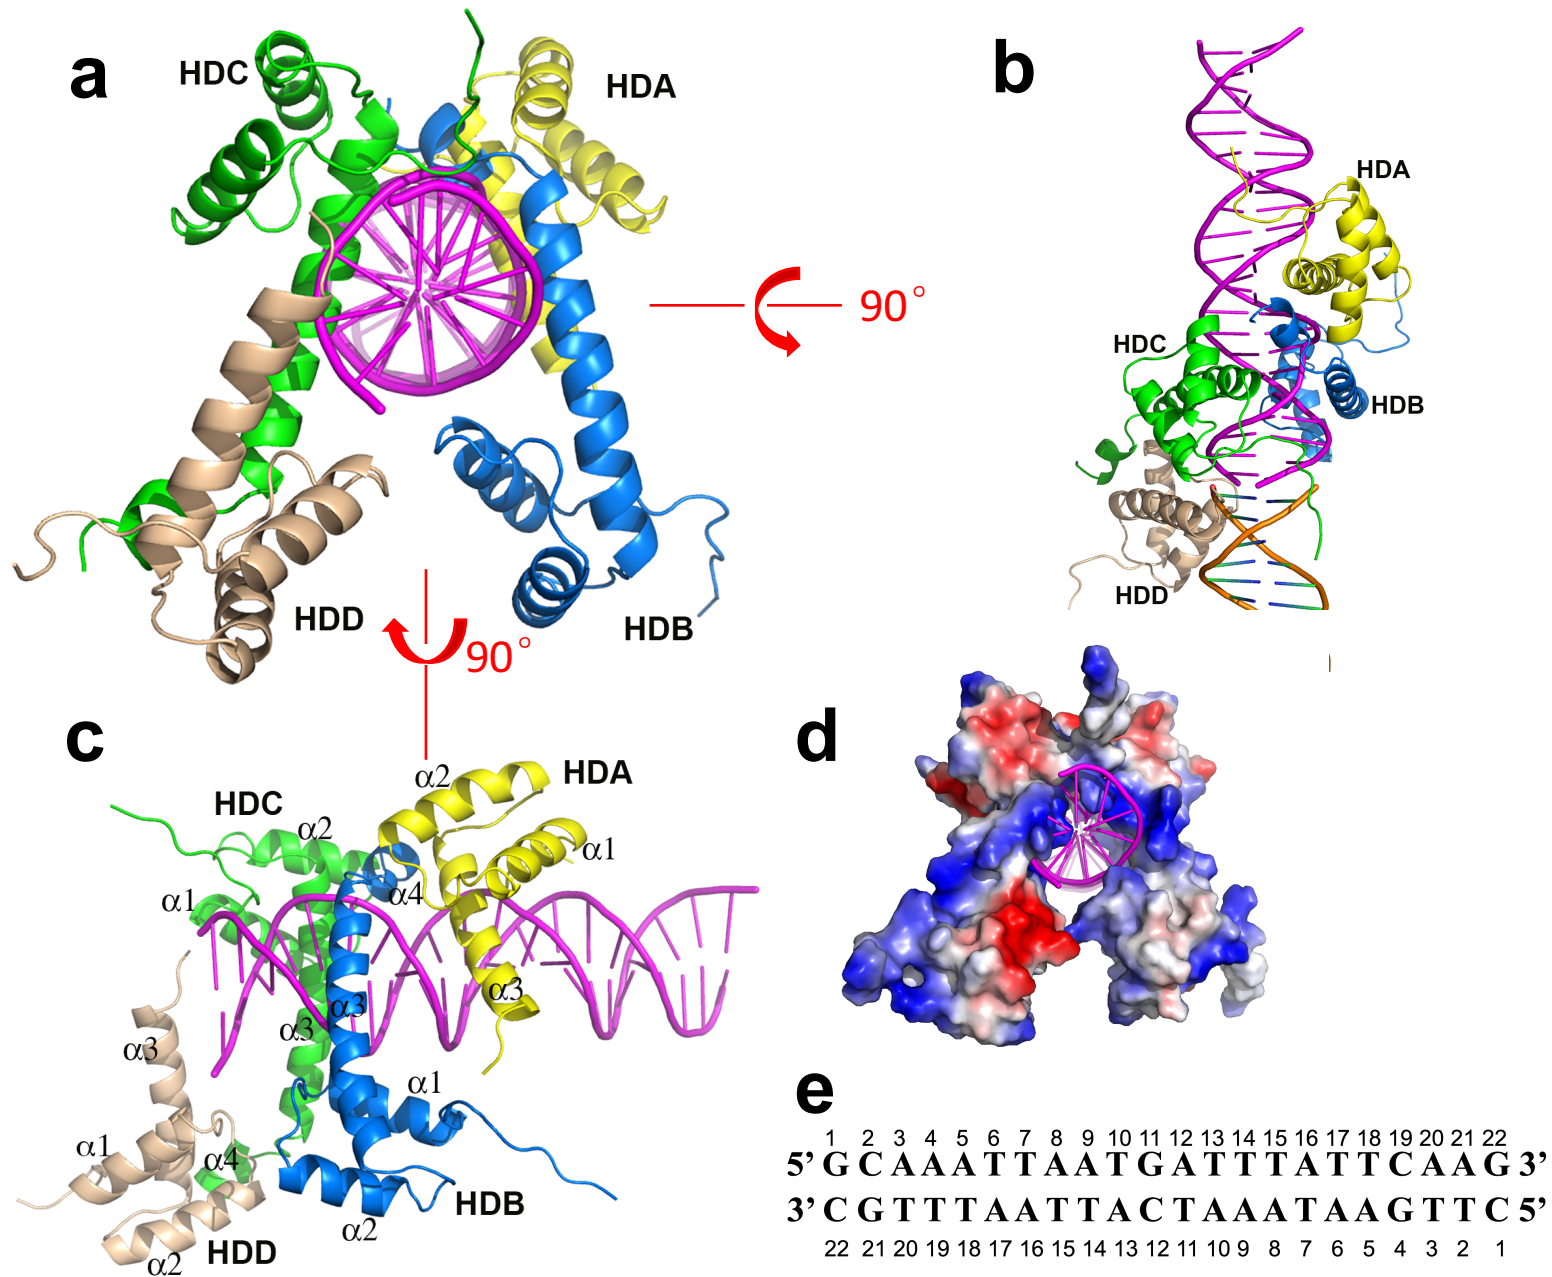

Fig.1

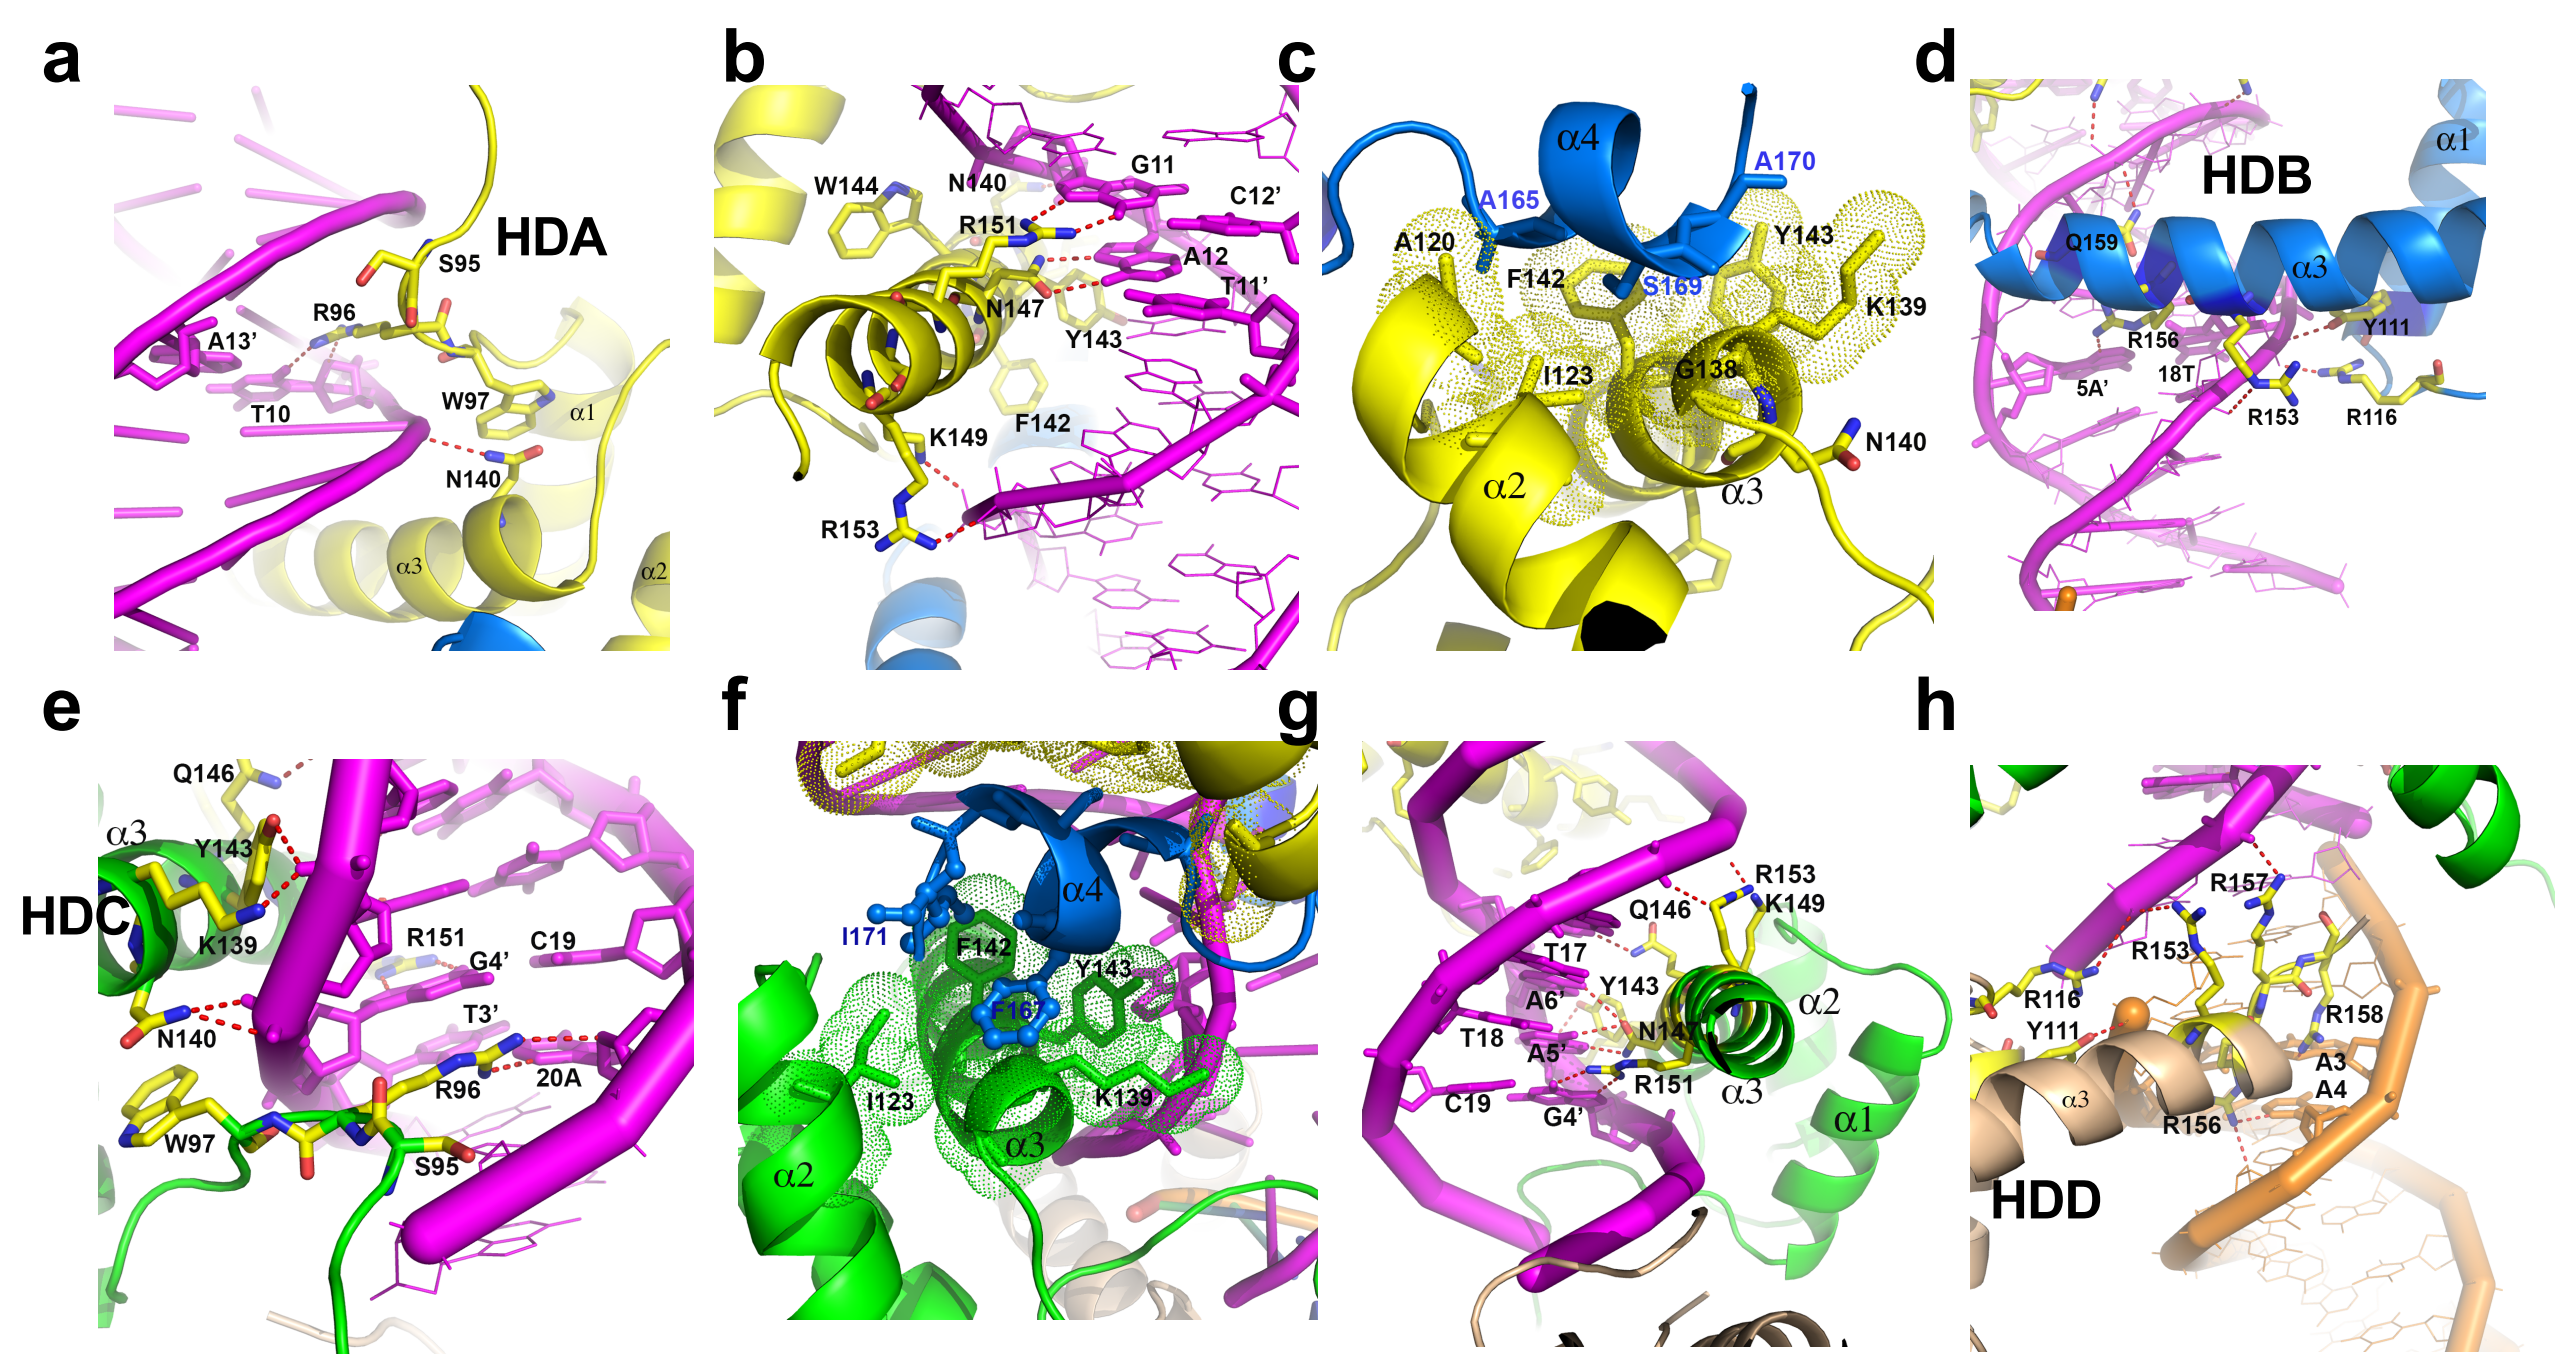

Fig. 2

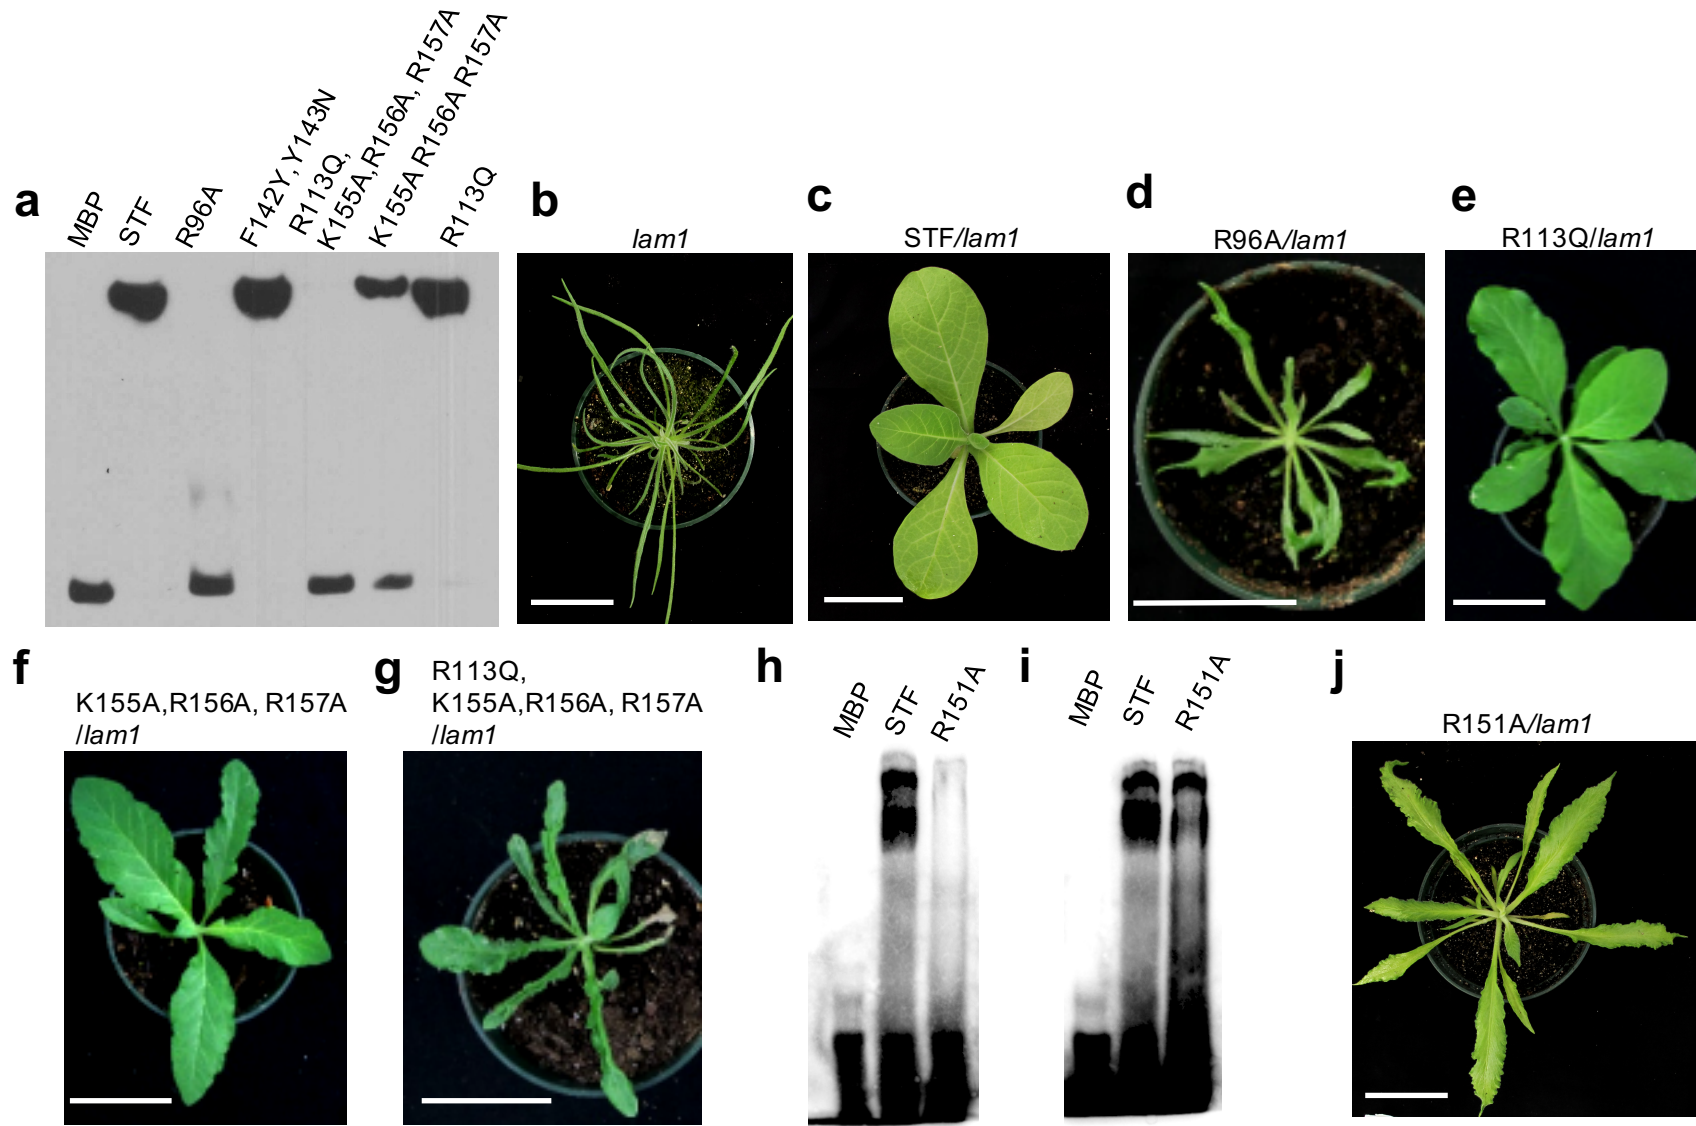

Fig. 3

## Extended Data

### Structure of the unique tetrameric STENOFOLIA homeodomain bound with DNA

Prabhat Kumar Pathak<sup>+1</sup>, Fei Zhang<sup>+2</sup>, Shuxia Peng<sup>+1</sup>, Lifang Niu<sup>2</sup>, Juhi chaturvedi<sup>1</sup>, Million Tadege<sup>2</sup>, Junpeng Deng<sup>\*1</sup>

<sup>1</sup>*Department of Biochemistry and Molecular biology, Oklahoma State University, Stillwater, OK 74078, USA.*

<sup>2</sup>*Department of Plant and Soil Sciences, Institute for Agricultural Biosciences, Oklahoma State University, Ardmore, OK 73401, USA.*

Running title: Structural basis for DNA binding by STF

<sup>+</sup>These authors contribute equally

**\*Corresponding author.** All correspondence should be addressed to: Dr. Junpeng Deng, Email: Junpeng.deng@okstate.edu



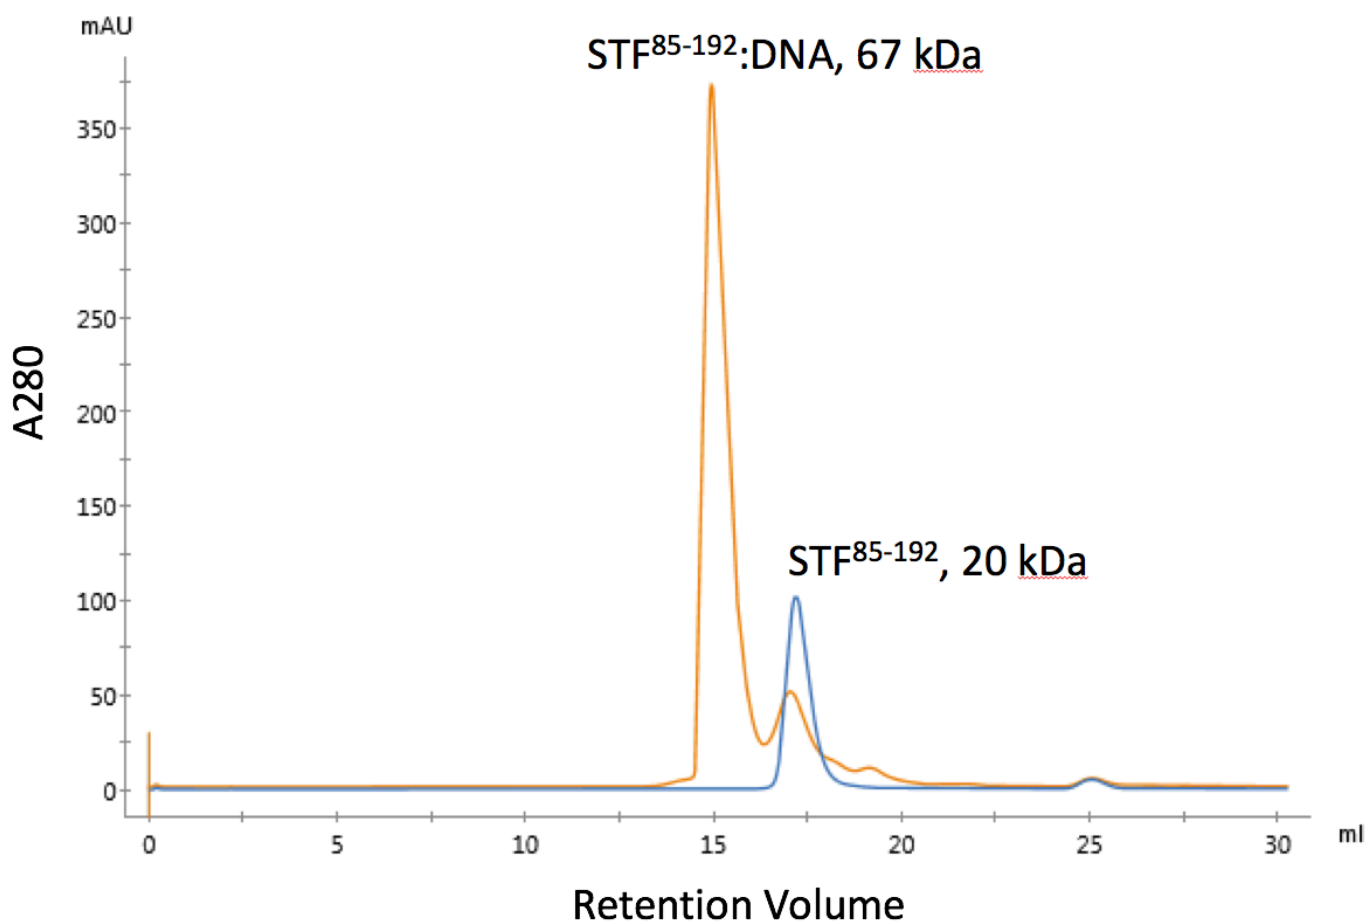

**Extended Data Figure 1** Gel filtration analysis of STF<sup>85-190</sup> and its complex with DNA. Chromatographs of apo protein (blue) and the DNA complex (orange) from a superdex s200 column are shown. The estimated MW of apo protein from the retention volume is about 20 kDa, which is larger than the theoretic MW of 12.5 kDa of STF<sup>85-190</sup> due to its elongated shape. This data is in agreement to the STF<sup>85-190</sup> monomer with calculated apparent MW of 22.5kDa in solution ([www.fluidic.com](http://www.fluidic.com)) based on its calculated hydrodynamic radius of 23.4Å using the current crystal structure<sup>56</sup>. The peak fraction collected from the complex was tested for A280/A260 with 1.61 value, suggesting 1 DNA:4 protein in the complex.

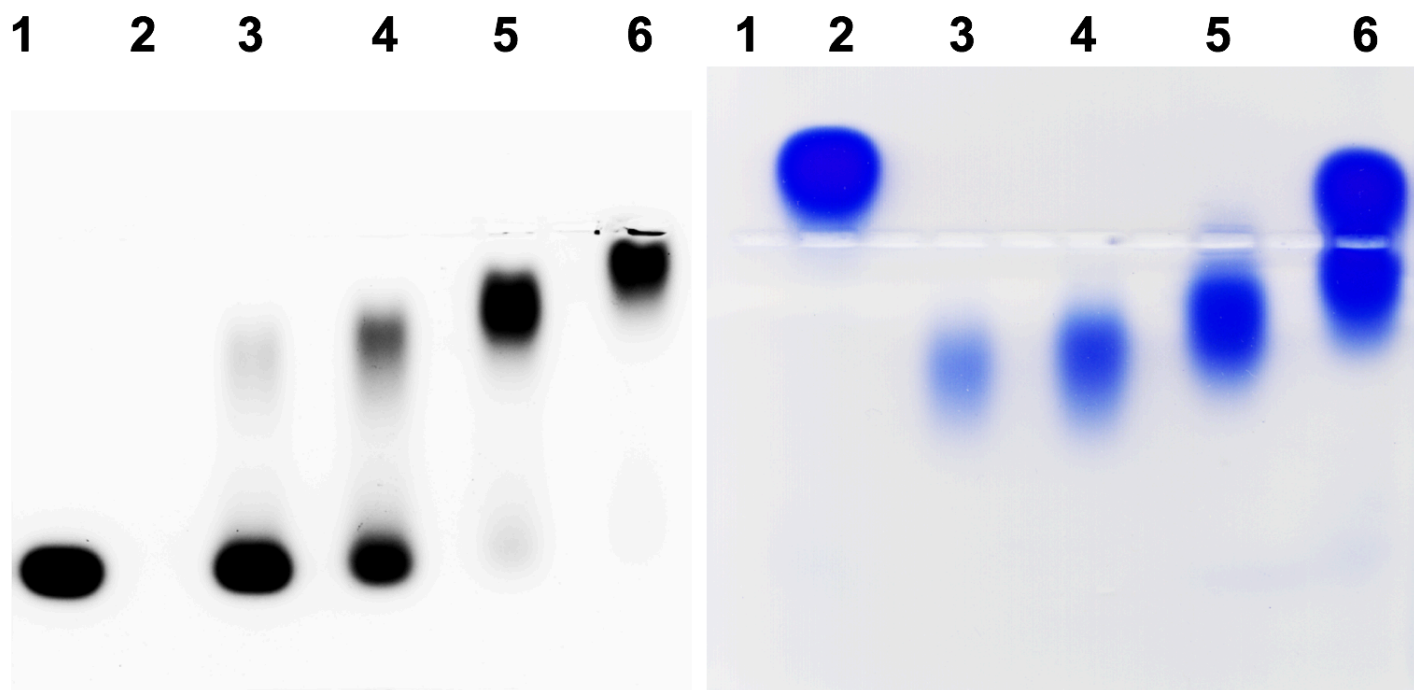

**Extended Data Figure 2** EMSA analysis of STF<sup>85-190</sup> binding with 6-FAM labeled DNA. Left, the fluorescence signal from the DNA is captured. Right, the same gel is stained with coomassie blue to show the protein. Lane 1, 6-FAM labeled DNA; 2, apo protein; 3-6, DNA:protein mixed at molar ratios of 1:1, 1:2, 1:4 and 1:8 respectively. Note that STF<sup>85-190</sup> forms stable complex with DNA at 1:4 molar ratio, lane 5.

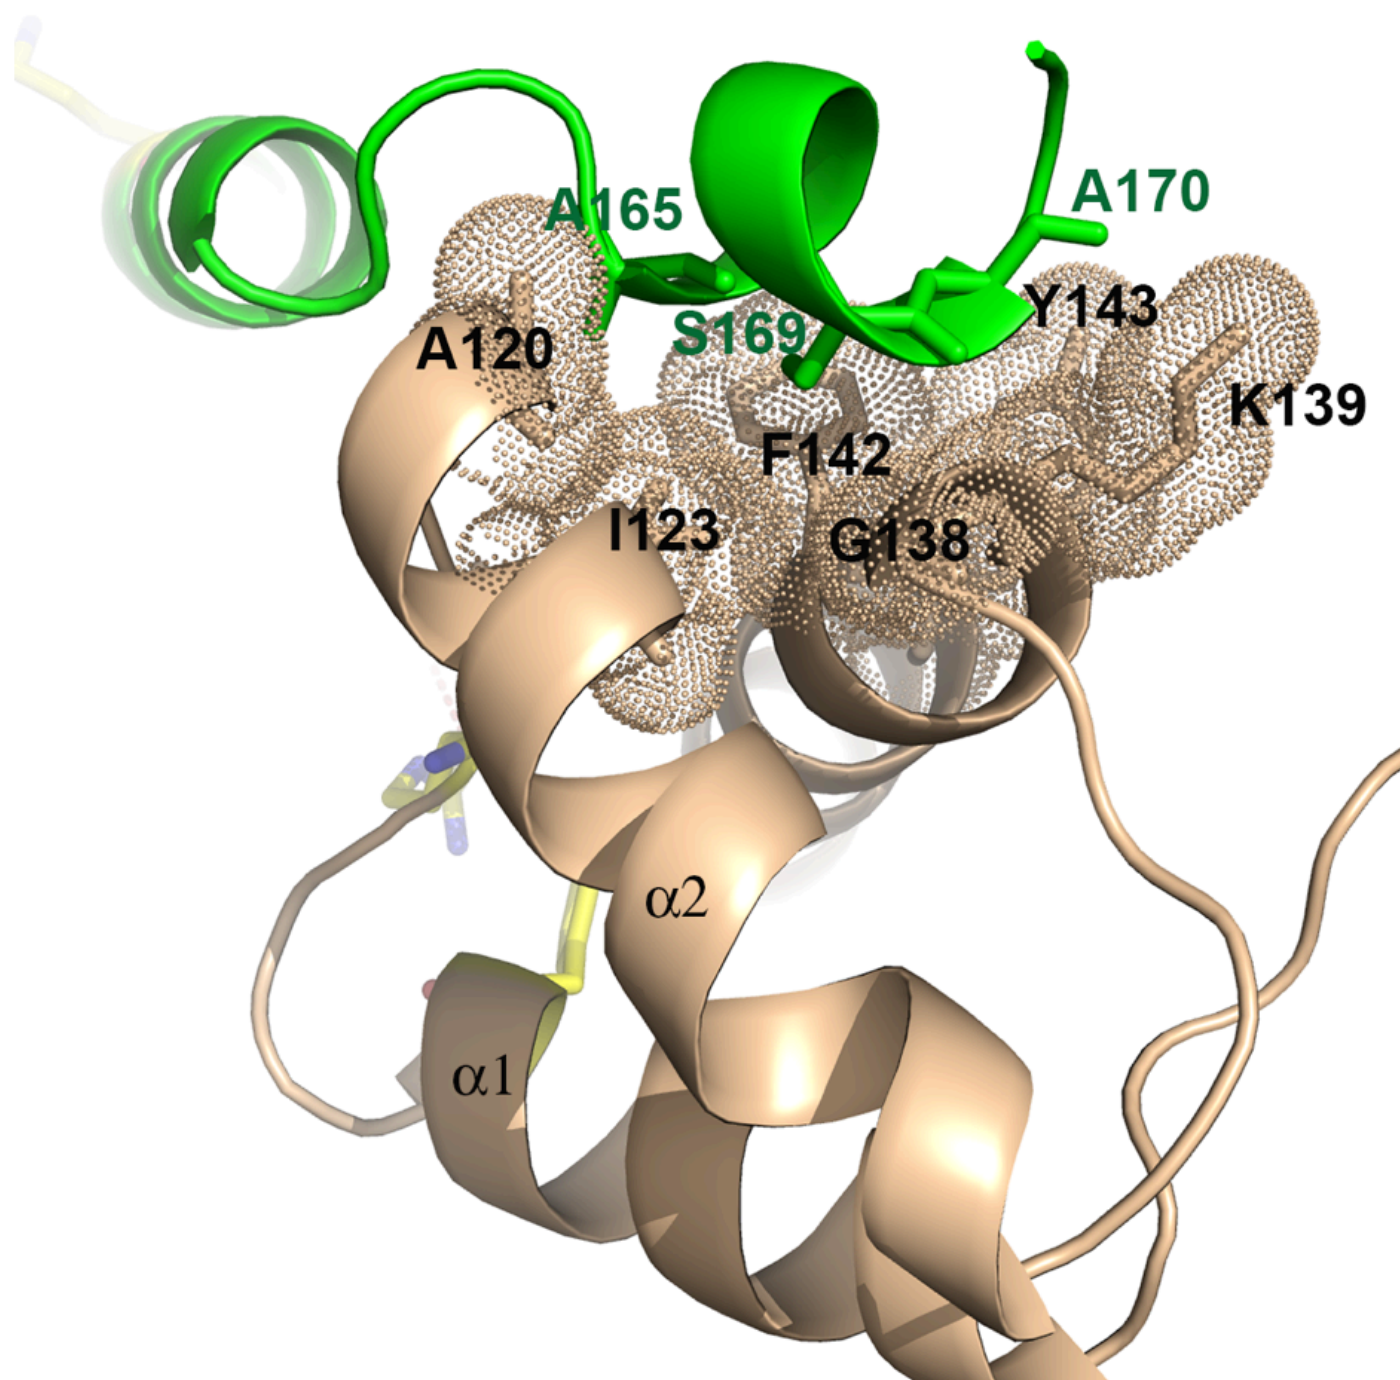

**Extended Data Figure 3**    **The HDC:HDD dimer interface.** The helix  $\alpha_4$  of HDC is shown in green and the residues on the hydrophobic surface of HDD (colored in light brown) are shown as sticks with dotted envelopes indicating van der Waals radius. This interface is same as observed in HDA:HDB.

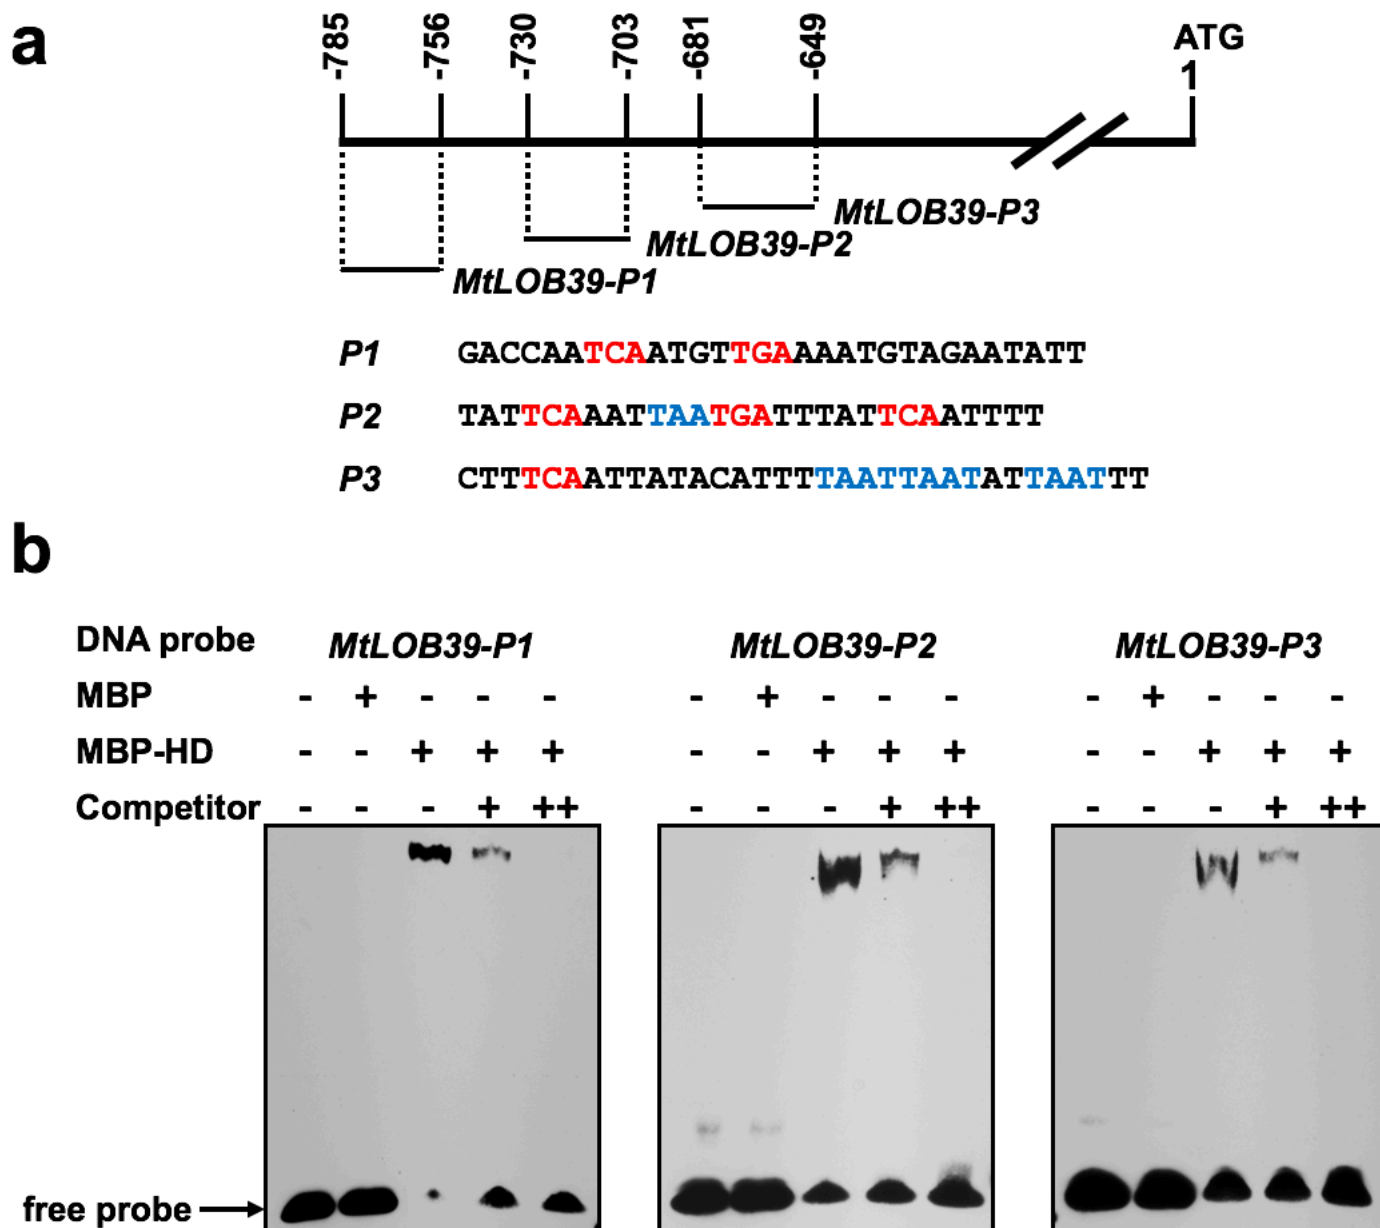

**Extended Data Figure 4** STF-HD specifically interacts with *MtLOB39* promoter regions. **a.** Diagram of *MtLOB39* promoter regions and the sequences containing “TGA” (red) and/or “TAAT” (blue) core sequences.

**b.** EMSA showing that MBP-STF-HD specifically binds to all the P1, P2, P3 regions of the *MtLOB39* promoter. Fifty-fold excess unlabeled same oligos were used as competitors to show specific binding.

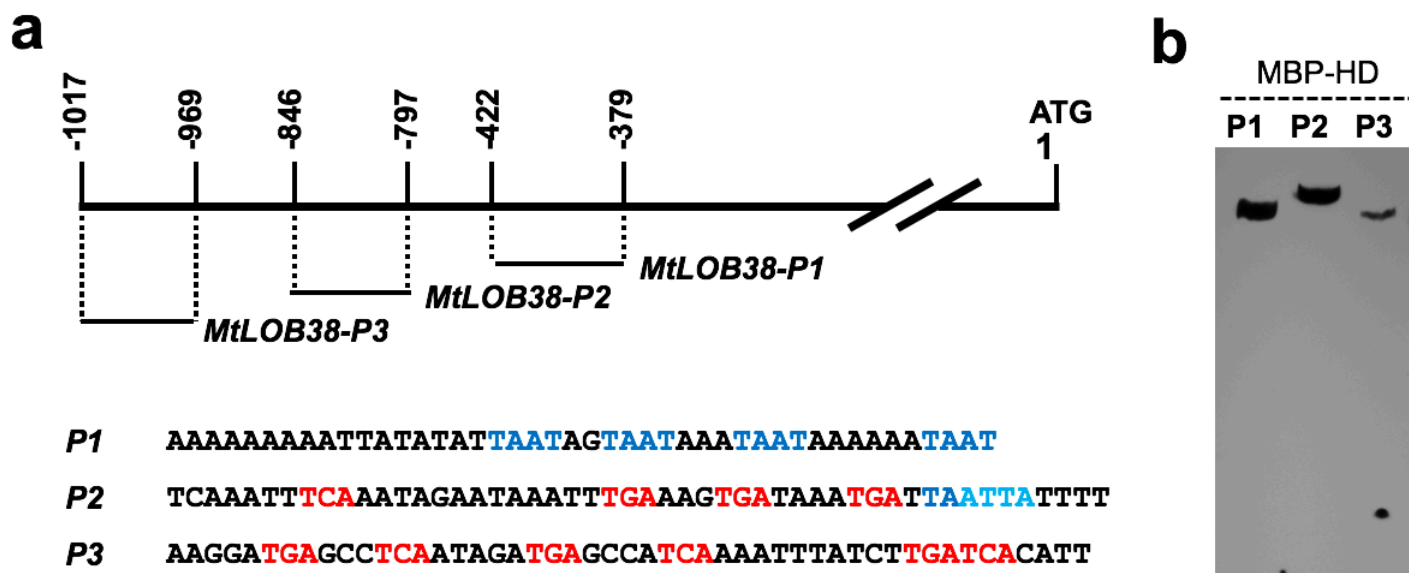

**Extended Data Figure 5** STF-HD specifically interacts with *MtLOB38* promoter regions. **a.** Diagram of *MtLOB38* promoter regions and the sequences containing “TGA” (red) and/or “TAAT” (blue) core sequences. **b.** EMSA showing that MBP-STF-HD binds to all the P1, P2, P3 regions of the *MtLOB38* promoter.

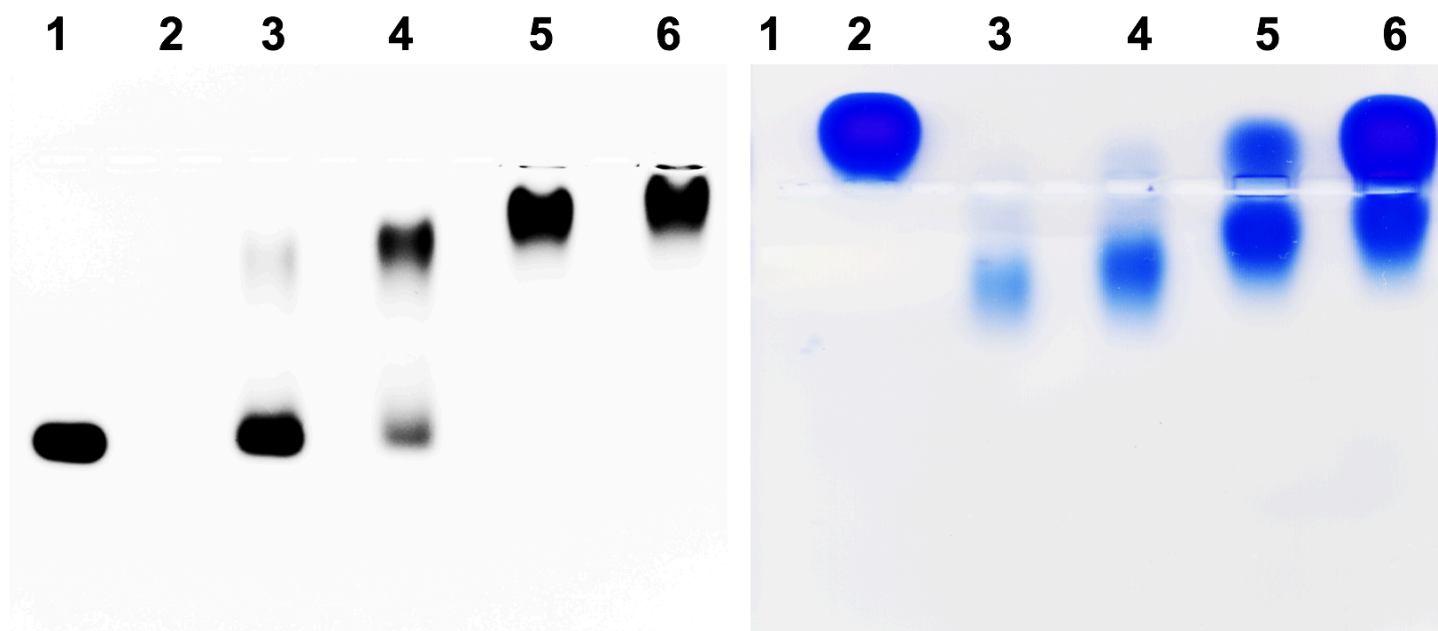

**Extended Data Figure 6 EMSA analysis of STF<sup>85-190</sup> R151A mutant binding with 6-FAM labeled DNA.**

Left, the fluorescence signal from the DNA is captured. Right, the same gel is stained with coomassie blue to show the protein. Lane 1, 6-FAM labeled DNA; 2, apo protein; 3-6, DNA:protein mixed at molar ratios of 1:1, 1:2, 1:4 and 1:8 respectively. Note that STF<sup>85-190</sup> shifted most of the DNA at 1:2 molar ratio (lane 4), indicating the dissociation of the tetramer.

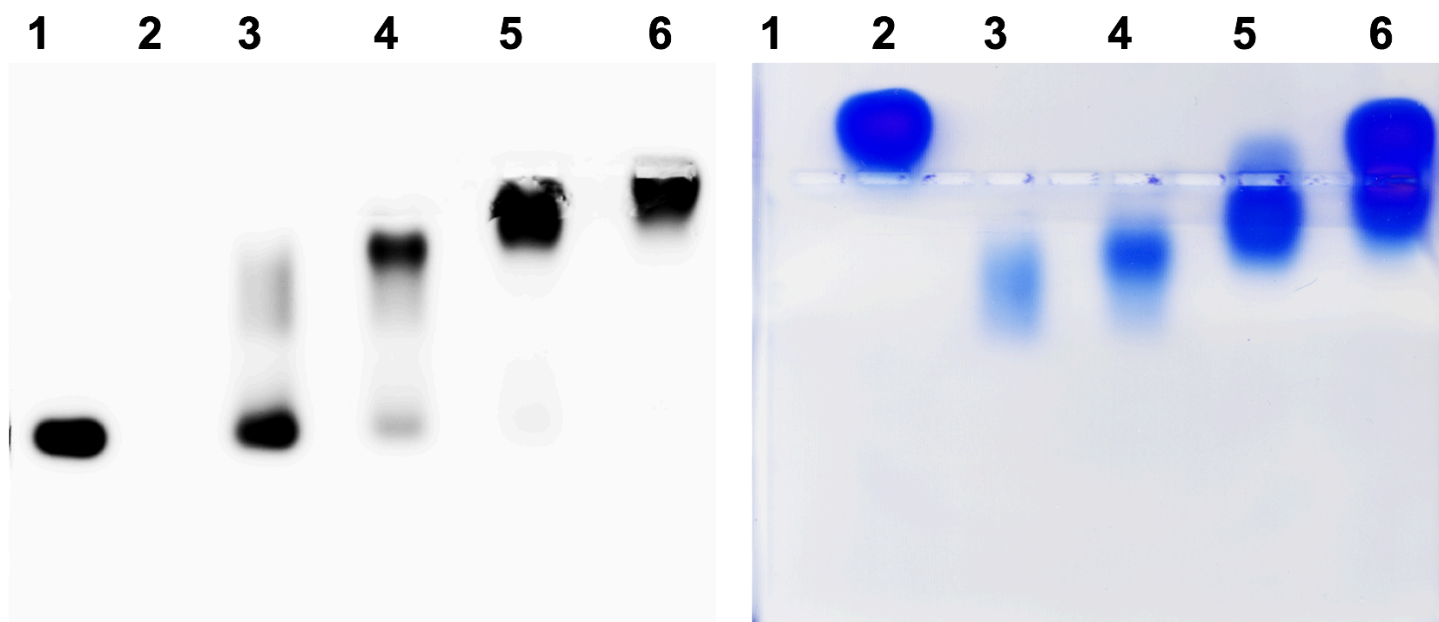

**Extended Data Figure 7 EMSA analysis of STF<sup>85-190</sup> F142Y/Y143N mutant binding with 6-FAM labeled DNA.** Left, the fluorescence signal from the DNA is captured. Right, the same gel is stained with coomassie blue to show the protein. Lane 1, 6-FAM labeled DNA; 2, apo protein; 3-6, DNA:protein mixed at molar ratios of 1:1, 1:2, 1:4 and 1:8 respectively. Note that STF<sup>85-190</sup> shifted most of the DNA at 1:2 ratio (lane 4), indicating the dissociation of the tetramer.

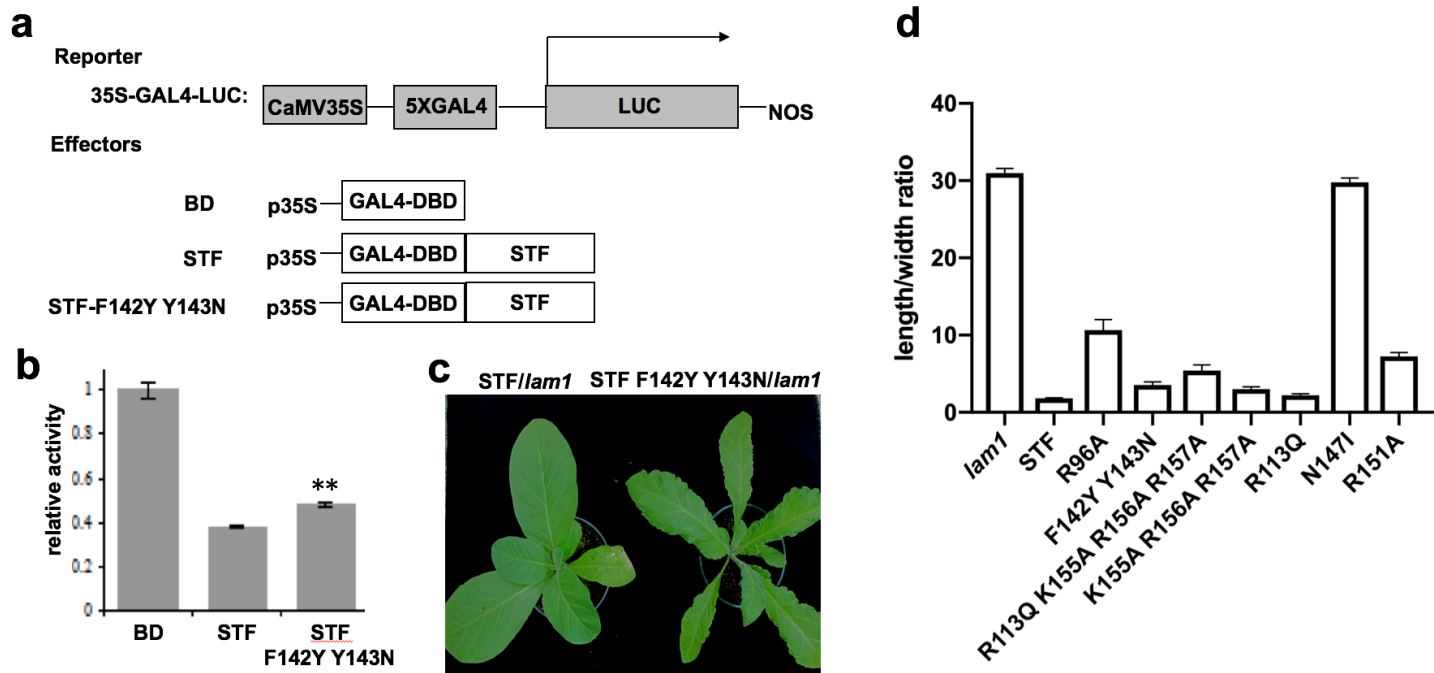

**Extended Data Figure 8    STF F142Y/Y143N mutant has reduced repressive activity and compromised biological function.** **a.** Diagram of reporter and effector constructs used in dual luciferase assays. **b.** Relative activity of STF or STF F142Y/Y143N mutant on the reporter. STF F142Y/Y143N mutant showed significantly reduced repressive activity compared to STF. Standard errors were calculated from the means of three biological replicates, each runs in triplicate. \*\*,  $P < 0.01$  (t-test). **c.** STF F142Y/Y143N showed reduced activity in complementing the *lam1* narrow leaf phenotype. **d.** Complementation of *lam1* mutant by STF with or without mutations in the homeodomain. The leaf length/width ratio was calculated from the largest leaves of each plant, at least 10 independent lines of each construct were measured.



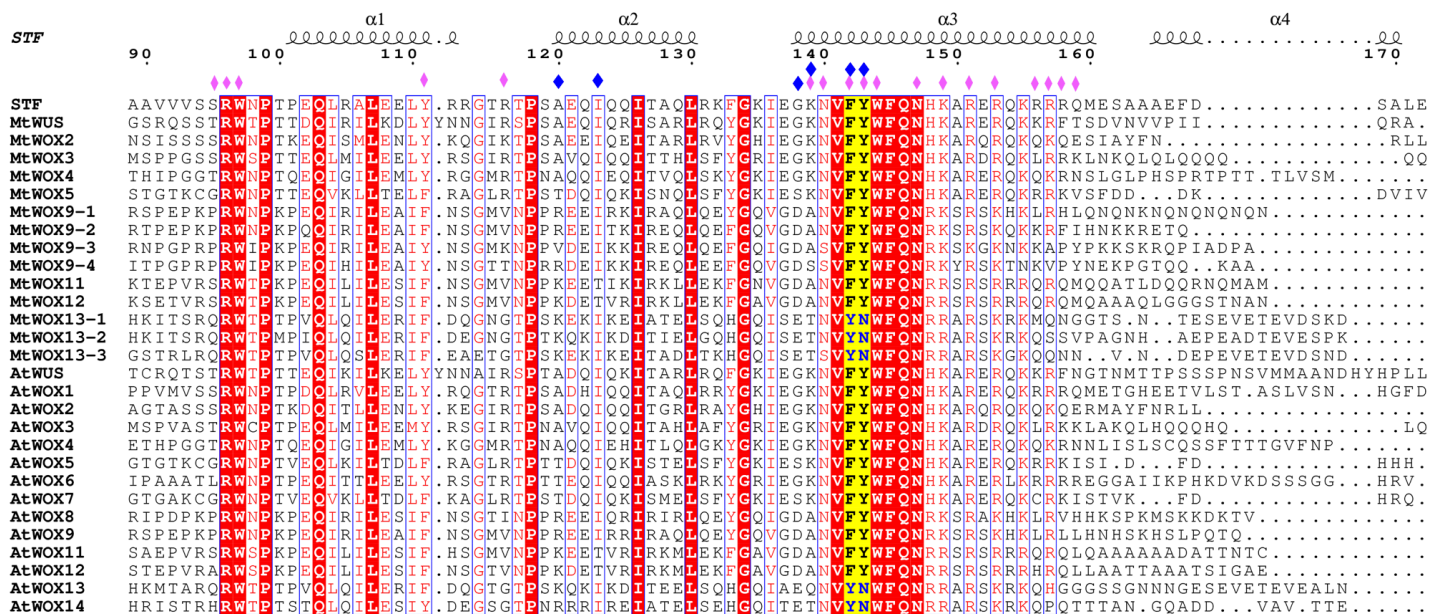

### Extended Data Figure 9 Structure based sequence alignment of selected WOX HD domains. Structure

based sequence alignment of various STF HD orthologs was created using the crystal structures of STF<sup>85-190</sup> as the template. Lettering and numbering above the alignment correspond to STF<sup>85-190</sup> topology and numbering scheme. Sequence alignment was performed with SSM server<sup>57</sup>, and the figure was created with ESPrpt<sup>58</sup>.

Residues involved in DNA binding are indicated with purple diamonds and residues that constitute the docking platform at the dimer interface are indicated with blue diamonds.

- 56 Fleming, P. J. & Fleming, K. G. HullRad: Fast Calculations of Folded and Disordered Protein and Nucleic Acid Hydrodynamic Properties. *Biophysical journal* **114**, 856-869, doi:10.1016/j.bpj.2018.01.002 (2018).
- 57 Krissinel, E. & Henrick, K. Secondary-structure matching (SSM), a new tool for fast protein structure alignment in three dimensions. *Acta crystallographica. Section D, Biological crystallography* **60**, 2256-2268, doi:10.1107/s0907444904026460 (2004).
- 58 Gouet, P., Rober, X. and Courcelle, E. ESPrpt/ENDscript: extracting and rendering sequence and 3D information from atomic structures of proteins *Nucleic Acids Research* **31**, 3320-3323 (2003).

## Extended Data Table I. Crystallographic data and statistics

| Data collection                              | SeMet_STF_M_Peak       | Native_STF             |
|----------------------------------------------|------------------------|------------------------|
| Beamline                                     | 19-ID, APS             | 19-ID, APS             |
| Wavelength, Å                                | 0.97918                | 0.97935                |
| Space group                                  | P2 <sub>1</sub>        | P2 <sub>1</sub>        |
| Cell parameters a, b, c, Å                   | 46.3, 49.0, 70.0       | 48.1, 49.5, 69.8       |
|                                              | $\beta=105.9^\circ$    | $\beta=106.5^\circ$    |
| Resolution, Å                                | 50.00–2.50 (2.59–2.50) | 50.00–2.10 (2.18–2.10) |
| Total reflections                            | 55,241                 | 142,294                |
| Unique reflections                           | 10,086 (794)           | 17,554 (1,431)         |
| Redundancy                                   | 5.5 (3.6)              | 8.1 (5.8)              |
| Completeness, %                              | 94.1 (74.0)            | 95.2 (77.7)            |
| I/ $\sigma$                                  | 14.2 (2.5)             | 23.5 (1.9)             |
| Rsym, %                                      | 13.0 (48.6)            | 8.0 (66.2)             |
| CC1/2, %                                     | 95.4 (81.6)            | (81.4)                 |
| Refinement statistics                        |                        |                        |
| Resolution range used, Å                     |                        | 46.1–2.1               |
| No. reflections used                         |                        | 17,488                 |
| Rwork/Rfree, %                               |                        | 19.4/25.0              |
| Rmsd bond lengths, Å                         |                        | 0.010                  |
| Rmsd bond angles, °                          |                        | 1.214                  |
| Number of atoms (average B, Å <sup>2</sup> ) |                        |                        |
| Protein                                      |                        | 1,285 (65.0)           |
| Ligand                                       |                        | 902 (55.0)             |
| Water                                        |                        | 44 (46.5)              |
| Ramachandran values                          |                        |                        |
| Preferred regions, %                         |                        | 97.7                   |
| Allowed regions, %                           |                        | 2.3                    |

Values in parentheses are for the highest-resolution shell.

$R_{\text{sym}} = \sum |I_{\text{obs}} - I_{\text{avg}}| / \sum I_{\text{avg}}$ ;  $R_{\text{work}} = \sum ||F_{\text{obs}}| - |F_{\text{calc}}|| / \sum F_{\text{obs}}$ .

$R_{\text{free}}$  was calculated using 5% of data.
